# Supplementary material for: Aspergillus Fumigatus ZnfA, a Novel Zinc Finger Transcription Factor Involved in Calcium Metabolism and Caspofungin Tolerance
Source: Front Fungal Biol. 2021 Aug 10;2:689900. doi: 10.3389/ffunb.2021.689900 (PMC10512341; doi:10.3389/ffunb.2021.689900)
Supplement: Supplementary Table 1 — Binding of ZnfA:3xHA to target genes that are shared between the control and caspofungin conditions (common), unique to the control condition (control_exclusive) and unique to caspofungin condition (casofungin_exclusive). [file Table_1.XLSX]

## Sheet: Common
	Caspofungin				Control
upstream_closest_gene	pileup	log10(pvalue)	fold_enrichment	log10(qvalue)	pileup	log10(pvalue)	fold_enrichment	log10(qvalue)	gene_name	description
Afu1g13400	36	4.08952	1.91511	2.15819	40	7.92787	2.62484	4.57253	Afu1g13400	Has domain(s) with predicted zinc ion binding activity
Afu4g10350	35	4.54125	2.0316	2.51175	37	6.01481	2.30583	2.90467	ubiD	Polyubiquitin; calcium induced
Afu1g10460	32	4.7234	2.14047	2.64912	44	9.69498	2.85171	6.19238	Afu1g10460	Ortholog of Neosartorya fischeri NRRL 181 : NFIA_015190 and Aspergillus clavatus NRRL 1 : ACLA_025070
Afu4g06660	48	5.10597	1.92762	2.95659	45	10.7477	3.02632	7.16542	Afu4g06660	Ortholog of Aspergillus fumigatus A1163 : AFUB_063740
Afu5g04440	34	5.13681	2.1875	2.98282	42	10.3082	3.05659	6.75808	Afu5g04440	Ortholog(s) have RNA stem-loop binding, double-stranded RNA binding, ribonuclease III activity
Afu3g14140	48	5.31815	1.96314	3.13522	44	10.2332	2.96053	6.68754	casB	Predicted metacaspase, an aspartate-specific cysteine protease involved in apoptosis; mutants show growth defects under conditions of ER stress
Afu6g02880	38	6.04174	2.28605	3.73301	34	6.18673	2.43056	3.05507	Afu6g02880	Predicted DDE1 transposon-related ORF
Afu5g15080	36	6.31815	2.39992	3.9638	36	7.33425	2.63009	4.04227	Afu5g15080	Has domain(s) with predicted ATP binding, protein kinase activity and role in protein phosphorylation
Afu1g04870	45	6.38948	2.19885	4.02507	35	5.90013	2.33463	2.82065	Afu1g04870	Ortholog(s) have putrescine transmembrane transporter activity, spermidine transmembrane transporter activity, urea transmembrane transporter activity and role in putrescine transport, spermidine transport, urea transport
Afu8g02810	51	6.40689	2.09677	4.04037	46	8.77722	2.61111	5.35154	Afu8g02810	Ortholog(s) have role in filamentous growth of a population of unicellular organisms, fungal-type cell wall organization and membrane localization
Afu4g07990	38	6.65699	2.41636	4.26119	38	7.65041	2.63158	4.32609	Afu4g07990	Ortholog of A. nidulans FGSC A4 : AN10480, A. niger CBS 513.88 : An04g02410, A. oryzae RIB40 : AO090023000772, Aspergillus wentii : Aspwe1_0102632 and Aspergillus sydowii : Aspsy1_0149200
Afu4g10110	45	6.83556	2.27948	4.40991	47	10.8261	2.96663	7.23993	htfA	Putative homeobox transcription factor; calcium induced
Afu5g09820	53	7.0103	2.16	4.56565	48	7.00276	2.24771	3.75527	Afu5g09820	Predicted DDE1 transposon-related ORF; putative transposase
Afu6g09110	44	7.07684	2.34619	4.62383	60	17.5748	3.6747	13.3842	Afu6g09110	Ortholog(s) have L-asparagine transmembrane transporter activity, L-isoleucine transmembrane transporter activity, L-lysine transmembrane transporter activity
Afu8g05985	40	7.15411	2.46394	4.69247	40	8.68191	2.78533	5.26625	Afu8g05985	Ortholog of A. nidulans FGSC A4 : AN1603, Neosartorya fischeri NRRL 181 : NFIA_098760, NFIA_099140, Aspergillus wentii : Aspwe1_0689083 and Aspergillus versicolor : Aspve1_0037404
Afu3g15350	52	7.50656	2.25532	4.99688	40	6.30131	2.2905	3.15121	Afu3g15350	Has domain(s) with predicted oxidoreductase activity and role in metabolic process
Afu7g08220	47	7.52869	2.35988	5.01661	48	7.17354	2.27695	3.90402	Afu7g08220	Ortholog of Aspergillus fumigatus A1163 : AFUB_080330, AFUB_092580
Afu3g13860	60	7.91861	2.18481	5.35914	61	15.0047	3.20911	11.0878	Afu3g13860	Predicted DDE1 transposon-related ORF; putative transposase
Afu5g14920	57	8.11373	2.26033	5.52874	51	6.87657	2.1721	3.64209	Afu5g14920	Protein of unknown function; predicted gene pair with AFUA_5G07980
Afu8g05010	77	8.34786	2.03231	5.73934	42	8.4466	2.66749	5.04736	zfpA	Putative C2H2 zinc-finger transcription factor; transcript induced by voriconazole and calcium
Afu8g02870	54	8.78547	2.41865	6.13188	44	8.88532	2.69139	5.45306	Afu8g02870	Ortholog of A. nidulans FGSC A4 : AN8871, A. niger CBS 513.88 : An03g06980, Aspergillus wentii : Aspwe1_0046794, Aspergillus sydowii : Aspsy1_0061946 and Aspergillus terreus NIH2624 : ATET_10403
Afu3g10120	50	9.10562	2.56281	6.41976	35	5.56247	2.25847	2.54545	Afu3g10120	Putative TATA box binding protein; calcium induced
Afu2g08350	52	9.49026	2.57782	6.77453	46	7.43972	2.36657	4.13632	Afu2g08350	Has domain(s) with predicted role in transmembrane transport and integral component of membrane localization
Afu7g08540	73	13.3018	2.66379	10.3079	44	6.4255	2.22552	3.25556	Afu7g08540	Ortholog of Aspergillus fumigatus A1163 : AFUB_097680, AFUB_098040
Afu3g06810	66	14.7245	3.0153	11.6508	50	10.3727	2.78384	6.8201	Afu3g06810	Predicted DDE1 transposon-related ORF
Afu4g06160	112	16.9153	2.4608	13.7254	110	51.8058	6.28539	44.4853	Afu4g06160	Branched-chain-amino-acid transaminase; SrbA-regulated during hypoxia
Afu1g13980	102	20.7246	2.93113	17.3447	49	11.6406	3.04878	7.99617	Afu1g13980	Ortholog of A. nidulans FGSC A4 : AN2186, AN10116, A. niger CBS 513.88 : An08g07120, An12g09760, An05g02480, An12g10180 and A. oryzae RIB40 : AO090010000355, AO090010000554
Afu2g10400	86	24.4031	3.7116	20.8483	43	7.01391	2.35799	3.76451	Afu2g10400	Has domain(s) with predicted DNA binding, DNA-binding transcription factor activity, RNA polymerase II-specific, zinc ion binding activity and role in regulation of transcription, DNA-templated, transcription, DNA-templated
Afu4g03325	247	91.4846	5.05916	86.4989	108	45.3598	5.50505	39.7545	Afu4g03325	Ortholog of Aspergillus fumigatus A1163 : AFUB_099730
Afu3g03520	196	107.349	7.96926	101.948	57	18.0805	3.90836	13.8451	Afu3g03520	Putative integral membrane protein

## Sheet: control_exclusive
upstream_closest_gene	pileup	pvalue	fold_enrichment	qvalue	gene_name	description
Afu1g07750	39	8.32105	2.74348	4.93111	Afu1g07750	Ortholog(s) have role in chromatin remodeling and Clr6 histone deacetylase complex I'', Rpd3L-Expanded complex, Rpd3S complex localization
Afu1g11050	51	8.32135	2.40741	4.93123	Afu1g11050	Has domain(s) with predicted transmembrane transporter activity, role in transmembrane transport and integral component of membrane, membrane localization
Afu1g11220	40	9.20769	2.89958	5.74632	Afu1g11220	Predicted adhesin-like protein; ortholog of A. nidulans AN1160
Afu2g06205	41	7.1253	2.43056	3.86023	Afu2g06205	Ortholog of A. niger CBS 513.88 : An02g14850, A. oryzae RIB40 : AO090001000738, Aspergillus wentii : Aspwe1_0028348, Aspergillus clavatus NRRL 1 : ACLA_068110 and Aspergillus niger ATCC 1015 : 175113-mRNA
Afu2g08820	37	7.72599	2.68362	4.39584	Afu2g08820	Ortholog of A. nidulans FGSC A4 : AN6116, A. niger CBS 513.88 : An12g04450, A. oryzae RIB40 : AO090011000818, Aspergillus wentii : Aspwe1_0044988 and Aspergillus sydowii : Aspsy1_0045203
Afu2g16500	34	6.42999	2.48793	3.25556	Afu2g16500	Ortholog of A. nidulans FGSC A4 : AN7336, A. niger CBS 513.88 : An15g06925, Aspergillus wentii : Aspwe1_0026944, Aspergillus sydowii : Aspsy1_0054451 and Aspergillus terreus NIH2624 : ATET_02290
Afu2g17480	40	8.93161	2.83934	5.49575	Afu2g17480	Ortholog of A. nidulans FGSC A4 : AN2821, A. fumigatus Af293 : Afu2g00180, A. niger CBS 513.88 : An03g05360, An04g09420 and A. oryzae RIB40 : AO090102000063, AO090009000716
Afu3g03620	39	6.36547	2.32829	3.20728	Afu3g03620	Ortholog of A. nidulans FGSC A4 : AN8444/celA, A. fumigatus Af293 : Afu8g00680, A. niger CBS 513.88 : An03g05740, A. oryzae RIB40 : AO090138000033, AO090701000186 and Aspergillus wentii : Aspwe1_0040565
Afu3g03760	38	7.04657	2.5	3.79128	Afu3g03760	Protein of unknown function
Afu3g06750	35	6.71309	2.52101	3.50351	Afu3g06750	Ortholog of A. nidulans FGSC A4 : AN4786, A. niger CBS 513.88 : An11g09580, A. oryzae RIB40 : AO090020000322, Aspergillus wentii : Aspwe1_0562759 and Aspergillus sydowii : Aspsy1_0147721
Afu3g08430	38	7.16634	2.52591	3.89718	Afu3g08430	Ortholog(s) have mitochondrion localization
Afu3g10740	38	7.04657	2.5	3.79128	Afu3g10740	Putative RAB GTPase with a predicted role in regulation of endocytosis; transcript downregulated in response to amphotericin B
Afu3g12140	35	6.43031	2.45566	3.25556	Afu3g12140	Ortholog of A. nidulans FGSC A4 : AN5026, A. niger CBS 513.88 : An02g08280, A. oryzae RIB40 : AO090003000774, Aspergillus wentii : Aspwe1_0169199 and Aspergillus sydowii : Aspsy1_0087531
Afu4g01600	259	19.1121	1.8458	14.7696	Afu4g01600	Ortholog of Aspergillus fumigatus A1163 : AFUB_102100
Afu4g03330	60	14.6369	3.18372	10.7543	Afu4g03330	Ortholog of A. nidulans FGSC A4 : AN7165, A. niger CBS 513.88 : An14g01960, A. oryzae RIB40 : AO090011000165, Aspergillus wentii : Aspwe1_0053298 and Aspergillus sydowii : Aspsy1_0060563
Afu4g04820	38	7.55416	2.61044	4.23747	erg25B	Putative C-4 methyl sterol oxidase with a predicted role in ergosterol biosynthesis; SrbA-regulated during hypoxia
Afu4g09660	40	7.21194	2.47585	3.93914	Afu4g09660	Ortholog(s) have unfolded protein binding activity
Afu4g10100	36	6.70436	2.48656	3.49564	Afu4g10100	Has domain(s) with predicted oxidoreductase activity and role in oxidation-reduction process
Afu5g07980	39	5.50791	2.15285	2.51074	Afu5g07980	Protein of unknown function; predicted gene pair with AFUA_5G14920
Afu5g15140	34	6.42999	2.48793	3.25556	Afu5g15140	Protein of unknown function
Afu6g04310	33	5.28871	2.24868	2.33366	Afu6g04310	Has domain(s) with predicted RNA binding activity
Afu6g04610	36	7.14828	2.58741	3.88114	Afu6g04610	Ortholog(s) have RNA polymerase I activity, RNA polymerase III activity, role in tRNA transcription by RNA polymerase III, transcription by RNA polymerase I and RNA polymerase I complex, RNA polymerase III complex localization
Afu6g05350	41	8.19496	2.64817	4.81939	opsB	Putative aspartic-type endopeptidase; transcript induced by voriconazole; predicted signal sequence for secretion
Afu6g09300	36	5.38603	2.19454	2.41304	Afu6g09300	Has domain(s) with predicted DNA binding activity and role in DNA integration, DNA recombination
Afu6g09330	44	10.3873	2.99202	6.83272	Afu6g09330	Protein of unknown function
Afu6g09360	43	6.26019	2.21551	3.11768	Afu6g09360	Ortholog of Aspergillus fumigatus A1163 : AFUB_092710
Afu6g10110	34	6.42999	2.48793	3.25556	Afu6g10110	Predicted DDE1 transposon-related ORF
Afu6g10250	33	5.99542	2.41684	2.88794	aorO	Putative alkaline serine protease; sedolisin; predicted signal sequence for secretion
Afu6g12680	59	17.2315	3.65854	13.0738	Afu6g12680	Ortholog(s) have adenosine 5'-monophosphoramidase activity and role in nucleotide metabolic process
Afu7g02630	52	10.4742	2.74327	6.91159	Afu7g02630	Ortholog of Neosartorya fischeri NRRL 181 : NFIA_115340, Aspergillus versicolor : Aspve1_0416695, Aspergillus clavatus NRRL 1 : ACLA_064930 and Aspergillus niger ATCC 1015 : 189693-mRNA
Afu7g08245	37	5.50447	2.19653	2.50877	Afu7g08245	Protein of unknown function

## Sheet: CSP_exclusive
Iron homeostasis
Cell wall organization
upstream_closest_gene	pileup	log10(pvalue)	fold_enrichment	log10(qvalue)	gene_name	description
Afu3g12060	30	3.56143	1.90184	1.76728	Afu3g12060	Has domain(s) with predicted 5-methyltetrahydropteroyltriglutamate-homocysteine S-methyltransferase activity, zinc ion binding activity and role in methionine biosynthetic process
Afu5g10240	29	3.6558	1.94588	1.82301	Afu5g10240	Ortholog of A. nidulans FGSC A4 : AN2338, A. oryzae RIB40 : AO090020000142, AO090010000531, Neosartorya fischeri NRRL 181 : NFIA_077030 and Aspergillus wentii : Aspwe1_0033922, Aspwe1_0038721
Afu3g13560	30	3.70485	1.9375	1.86258	Afu3g13560	Ortholog of Aspergillus fumigatus A1163 : AFUB_035640
Afu3g08710	31	3.70799	1.91847	1.86519	Afu3g08710	Has domain(s) with predicted ATP binding, protein kinase activity and role in protein phosphorylation
Afu4g08120	30	3.72436	1.94236	1.87876	Afu4g08120	Ortholog of A. nidulans FGSC A4 : AN8404, A. fumigatus Af293 : Afu3g03000, A. oryzae RIB40 : AO090001000118 and Aspergillus wentii : Aspwe1_0166813, Aspwe1_0167086
Afu8g04160	32	3.74117	1.90751	1.89263	Afu8g04160	Has domain(s) with predicted ATP binding, ligase activity, tetrahydrofolylpolyglutamate synthase activity and role in biosynthetic process, folic acid-containing compound biosynthetic process
Afu1g10930	39	3.82476	1.81488	1.95983	Afu1g10930	Putative ammonium transporter; transcript downregulated in response to voriconazole
Afu2g12300	30	3.96608	2.00258	2.07394	Afu2g12300	Ortholog of A. nidulans FGSC A4 : AN6296, A. niger CBS 513.88 : An02g04340, A. oryzae RIB40 : AO090026000420, Aspergillus wentii : Aspwe1_0118064 and Aspergillus sydowii : Aspsy1_0152200
Afu1g06670	34	3.98596	1.92731	2.08268	Afu1g06670	Transcript up-regulated in conidia exposed to neutrophils
Afu5g08150	30	3.99879	2.01075	2.08268	Afu5g08150	Ortholog(s) have role in secondary metabolite biosynthetic process
Afu3g14050	30	3.99879	2.01075	2.08268	Afu3g14050	Ortholog of A. nidulans FGSC A4 : AN2496, A. niger CBS 513.88 : An09g04590, A. oryzae RIB40 : AO090012000722, Aspergillus wentii : Aspwe1_0408944 and Aspergillus sydowii : Aspsy1_0148044
Afu1g05940	30	3.99879	2.01075	2.08268	Afu1g05940	Ortholog(s) have role in RNA polymerase II preinitiation complex assembly, negative regulation of transcription by RNA polymerase II, positive regulation of transcription by RNA polymerase II and core mediator complex localization
Afu6g09200	33	4.04116	1.95853	2.11755	Afu6g09200	Has domain(s) with predicted FMN binding, oxidoreductase activity and role in oxidation-reduction process
Afu7g01490	38	4.06859	1.87861	2.14071	ptr2	Major facilitator superfamily (MFS) peptide transporter
Afu7g05650	36	4.10808	1.91909	2.17321	Afu7g05650	Ortholog of Aspergillus fumigatus A1163 : AFUB_091230
Afu4g12450	41	4.12752	1.84697	2.18889	Afu4g12450	Putative PH domain protein; conserved lysine-rich protein; Yap1-dependent induction in response to hydrogen peroxide; hypoxia repressed protein
Afu1g14810	33	4.13022	1.97905	2.19113	Afu1g14810	Ortholog(s) have role in ascospore formation, cell septum assembly, conidium formation, hyphal growth, response to fungicide, response to salt stress, sporocarp development involved in sexual reproduction
Afu4g10810	32	4.1327	2	2.19282	Afu4g10810	Has domain(s) with predicted hydrolase activity
Afu7g04795	38	4.15798	1.89689	2.214	Afu7g04795	Ortholog of A. nidulans FGSC A4 : AN10457, A. niger CBS 513.88 : An13g01320, A. oryzae RIB40 : AO090005000171, Neosartorya fischeri NRRL 181 : NFIA_025730 and Aspergillus clavatus NRRL 1 : ACLA_006450
Afu7g05540	31	4.16952	2.03046	2.22287	Afu7g05540	Has domain(s) with predicted hydrolase activity, acting on ester bonds activity and role in GPI anchor metabolic process, intracellular protein transport
Afu2g03500	37	4.1786	1.91726	2.23074	Afu2g03500	Has domain(s) with predicted transmembrane transporter activity, role in transmembrane transport and integral component of membrane localization
Afu1g17350	33	4.19058	1.99297	2.24037	Afu1g17350	Ortholog of A. oryzae RIB40 : AO090020000692, Neosartorya fischeri NRRL 181 : NFIA_008000, Aspergillus fumigatus A1163 : AFUB_016720 and Aspergillus clavatus NRRL 1 : ACLA_018150
Afu2g08000	32	4.26786	2.03202	2.30366	Afu2g08000	Ortholog of A. nidulans FGSC A4 : AN5847, A. niger CBS 513.88 : An05g00550, Neosartorya fischeri NRRL 181 : NFIA_083670 and Aspergillus wentii : Aspwe1_0175059, Aspwe1_0670697
Afu1g06040	31	4.2984	2.06186	2.32887	Afu1g06040	Putative sterol o-acyltransferase; transcript downregulated in response to voriconazole
Afu1g00560	41	4.353	1.89019	2.35847	Afu1g00560	Has domain(s) with predicted catalytic activity, nucleic acid binding, zinc ion binding activity and role in nucleoside metabolic process
Afu4g14000	31	4.35477	2.07561	2.35847	sedD	Putative tripeptidyl-peptidase of the sedolisin family; predicted signal sequence for secretion
Afu1g17270	31	4.35477	2.07561	2.35847		Metalloreductase involved in response to iron starvation; repressed by iron through SreA-dependent regulatory system
Afu8g06640	31	4.35477	2.07561	2.35847	Afu8g06640	Ortholog of Aspergillus fumigatus A1163 : AFUB_081130
Afu6g13100	31	4.35477	2.07561	2.35847	Afu6g13100	Has domain(s) with predicted phosphatase activity
Afu3g07940	31	4.35477	2.07561	2.35847	Afu3g07940	Has domain(s) with predicted phosphatidylinositol phospholipase C activity, phosphoric diester hydrolase activity and role in intracellular signal transduction, lipid metabolic process
Afu3g07340	31	4.35477	2.07561	2.35847	Afu3g07340	Ortholog of A. nidulans FGSC A4 : AN4839, A. niger CBS 513.88 : An02g13380, A. oryzae RIB40 : AO090020000189, Aspergillus wentii : Aspwe1_0559530 and Aspergillus sydowii : Aspsy1_0146522
Afu2g08900	31	4.35477	2.07561	2.35847	Afu2g08900	Putative voltage-gated chloride channel; transcript up-regulated in conidia exposed to neutrophils
Afu4g12780	33	4.35556	2.03106	2.35894	Afu4g12780	Ortholog of A. nidulans FGSC A4 : AN3599, A. niger CBS 513.88 : An01g08300, Aspergillus wentii : Aspwe1_0033856, Aspergillus sydowii : Aspsy1_0133560 and Aspergillus terreus NIH2624 : ATET_03160
Afu6g08170	38	4.36083	1.93837	2.36338	Afu6g08170	Ortholog(s) have rDNA binding activity, role in nucleolar large rRNA transcription by RNA polymerase I and nucleus localization
Afu6g03850	33	4.36607	2.03349	2.36776	Afu6g03850	Ortholog(s) have GTP binding, signal recognition particle binding activity, role in protein targeting to ER and signal recognition particle receptor complex localization
Afu5g02810	37	4.38662	1.96078	2.3849	Afu5g02810	Predicted DDE1 transposon-related ORF
Afu2g02310	32	4.39627	2.0625	2.39294	sur7	Cortical patch protein; transcript up-regulated in conidia exposed to neutrophils; induced by exposure to artemisinin
Afu6g07430	35	4.42799	2.00669	2.41893	Afu6g07430	Putative pyruvate kinase; reacts with rabbit immunosera exposed to A. fumigatus conidia
Afu3g06030	36	4.43558	1.98925	2.42533	Afu3g06030	Ortholog(s) have proteasome binding, protein binding, bridging, ubiquitin binding, ubiquitin conjugating enzyme activity
Afu6g02280	33	4.45099	2.05314	2.43792	aspf3	Allergen Asp f 3; peroxiredoxin family reductase; putative peroxismal membrane protein; IgE binding; protein induced by heat shock and by exposure to hydrogen peroxide; hypoxia induced protein; induced by gliotoxin exposure
Afu3g13180	37	4.48422	1.98123	2.46529	Afu3g13180	Ortholog of A. niger CBS 513.88 : An02g09040, A. oryzae RIB40 : AO090012000814, Neosartorya fischeri NRRL 181 : NFIA_064160 and Aspergillus wentii : Aspwe1_0170078
Afu3g07900	41	4.48795	1.91606	2.46812	Afu3g07900	Ortholog of A. nidulans FGSC A4 : AN8368, AN2952, A. fumigatus Af293 : Afu4g14080, Afu8g00900, A. niger CBS 513.88 : An02g11330, An03g05560 and A. oryzae RIB40 : AO090120000471
Afu4g04650	36	4.51601	2.00651	2.49111	Afu4g04650	Ortholog of A. nidulans FGSC A4 : AN10872, A. niger CBS 513.88 : An14g00190, A. oryzae RIB40 : AO090206000024, Aspergillus wentii : Aspwe1_0114521 and Aspergillus sydowii : Aspsy1_0158439
Afu5g06180	38	4.5236	1.97169	2.49765	Afu5g06180	Predicted DDE1 transposon-related ORF
Afu1g12230	33	4.52656	2.07065	2.49991	Afu1g12230	Ortholog of A. oryzae RIB40 : AO090023000461, Neosartorya fischeri NRRL 181 : NFIA_013280, Aspergillus fumigatus A1163 : AFUB_011700 and Aspergillus clavatus NRRL 1 : ACLA_023230
Afu4g08700	36	4.54651	2.01306	2.51647	Afu4g08700	Ortholog of Aspergillus fumigatus A1163 : AFUB_065790
Afu1g14640	33	4.54837	2.0757	2.51805	Afu1g14640	Ortholog of A. nidulans FGSC A4 : AN0805, A. niger CBS 513.88 : An01g12640, A. oryzae RIB40 : AO090003000485, Aspergillus wentii : Aspwe1_0487250 and Aspergillus sydowii : Aspsy1_0025994
Afu1g13790	38	4.55288	1.97769	2.52158	hhtA	Histone H3
Afu3g02870	36	4.55672	2.01525	2.52511	Afu3g02870	Has domain(s) with predicted hydrolase activity
Afu5g06970	35	4.57259	2.03851	2.53836	Afu5g06970	Ortholog of A. nidulans FGSC A4 : AN10975, A. niger CBS 513.88 : An17g00170, A. oryzae RIB40 : AO090701000290, Aspergillus versicolor : Aspve1_0135244 and Aspergillus clavatus NRRL 1 : ACLA_010110
Afu4g07700	34	4.58093	2.06125	2.5457	Afu4g07700	Clathrin, heavy chain; transcript downregulated in response to amphotericin B
Afu2g06140	35	4.58309	2.04082	2.54714	Afu2g06140	Ortholog(s) have uracil DNA N-glycosylase activity, role in DNA repair and mitochondrion, nucleus localization
Afu5g12860	54	4.61212	1.78109	2.57195	Afu5g12860	Ortholog of A. nidulans FGSC A4 : AN6823, A. niger CBS 513.88 : An14g06360, A. oryzae RIB40 : AO090120000406, Aspergillus wentii : Aspwe1_0039015 and Aspergillus sydowii : Aspsy1_0142898
Afu2g08650	34	4.6241	2.07101	2.58196	Afu2g08650	Has domain(s) with predicted zinc ion binding activity
Afu3g06970	35	4.62528	2.05011	2.58294	Afu3g06970	40S ribosomal protein S9; transcript induced by exposure to human airway epithelial cells
Afu7g05450	42	4.64068	1.92998	2.59625	sun1	Novel beta-1,3-glucan modifying enzyme involved in fungal morphogenesis
Afu7g05290	42	4.64068	1.92998	2.59625	Afu7g05290	Cytosolic small ribosomal subunit S13/S15; transcript repressed by exposure to human airway epithelial cells
Afu6g04280	33	4.6701	2.10396	2.62013	Afu6g04280	Ortholog of Neosartorya fischeri NRRL 181 : NFIA_050810, Aspergillus fumigatus A1163 : AFUB_094010 and Aspergillus clavatus NRRL 1 : ACLA_096320
Afu3g05340	42	4.68699	1.93868	2.63409	Afu3g05340	Ortholog of Aspergillus fumigatus A1163 : AFUB_043660
Afu3g02030	32	4.68705	2.13178	2.63409	Afu3g02030	Ortholog of Aspergillus fumigatus A1163 : AFUB_046370
Afu2g13760	45	4.68936	1.89613	2.63616	Afu2g13760	Ortholog(s) have role in ascospore-type prospore assembly, prospore membrane biogenesis and prospore membrane localization
Afu1g13440	53	4.69502	1.80361	2.64077	Afu1g13440	Has domain(s) with predicted copper ion binding, primary amine oxidase activity, quinone binding activity and role in amine metabolic process, oxidation-reduction process
Afu3g09660	43	4.71987	1.92982	2.64912	Afu3g09660	Ortholog of Aspergillus fumigatus A1163 : AFUB_039510
Afu4g12910	36	4.71241	2.04873	2.64912	Afu4g12910	Ortholog(s) have thiol-dependent ubiquitin-specific protease activity and role in carbon catabolite repression of transcription, endocytosis, protein K11-linked deubiquitination, protein K48-linked deubiquitination
Afu3g10500	35	4.71076	2.06897	2.64912	Afu3g10500	Ortholog of A. nidulans FGSC A4 : AN4938, A. niger CBS 513.88 : An16g04440, A. oryzae RIB40 : AO090003000596, Aspergillus wentii : Aspwe1_0049228 and Aspergillus sydowii : Aspsy1_0146146
Afu7g00130	32	4.7234	2.14047	2.64912	nscR	Pathway-specific Zn(II)2Cys6 transcriptional factor; encoded within the nsc/fcc secondary metabolite gene cluster; role in neosartoricin and fumicycline A biosynthesis; induced by contact with the bacterium Streptomyces rapamycinicus
Afu4g14640	32	4.7234	2.14047	2.64912	fetD	Putative zinc transporter; transcript upregulated during iron starvation
Afu8g06920	32	4.7234	2.14047	2.64912	Afu8g06920	Has domain(s) with predicted solute:proton antiporter activity, role in cation transport, transmembrane transport and integral component of membrane localization
Afu7g04660	32	4.7234	2.14047	2.64912	Afu7g04660	Ortholog(s) have role in establishment of cell polarity, mycelium development, spore germination and endoplasmic reticulum, hyphal tip, plasma membrane localization
Afu7g04480	32	4.7234	2.14047	2.64912	Afu7g04480	Ortholog(s) have role in gene conversion at mating-type locus, termination of copy-synthesis, maintenance of DNA repeat elements, reciprocal meiotic recombination and site of double-strand break localization
Afu6g13690	32	4.7234	2.14047	2.64912	Afu6g13690	Ortholog(s) have DNA topoisomerase type II (ATP-hydrolyzing) activity
Afu6g10840	32	4.7234	2.14047	2.64912	Afu6g10840	Protein of unknown function identified by mass spectrometry
Afu5g12740	32	4.7234	2.14047	2.64912	Afu5g12740	Has domain(s) with predicted role in transmembrane transport and integral component of membrane localization
Afu5g10110	32	4.7234	2.14047	2.64912	Afu5g10110	Ortholog of Aspergillus fumigatus A1163 : AFUB_057710
Afu5g06780	32	4.7234	2.14047	2.64912	Afu5g06780	Putative carbamoyl-phosphate synthase; protein induced by hydrogen peroxide
Afu5g01260	32	4.7234	2.14047	2.64912	Afu5g01260	Ortholog of A. oryzae RIB40 : AO090138000080, Aspergillus flavus NRRL 3357 : AFL2T_08758, Neosartorya fischeri NRRL 181 : NFIA_040860 and Aspergillus fumigatus A1163 : AFUB_049760
Afu3g01280	32	4.7234	2.14047	2.64912	Afu3g01280	Ortholog of A. nidulans FGSC A4 : AN7404, A. niger CBS 513.88 : An02g12500, An16g05960, An09g03800, A. oryzae RIB40 : AO090011000171 and Aspergillus wentii : Aspwe1_0036364, Aspwe1_0041299, Aspwe1_0112391
Afu2g08570	32	4.7234	2.14047	2.64912	Afu2g08570	Ortholog(s) have RNA cap binding activity, role in mRNA splicing, via spliceosome and commitment complex, nuclear cap binding complex localization
Afu2g04700	32	4.7234	2.14047	2.64912	Afu2g04700	Ortholog(s) have cytoplasmic stress granule, endoplasmic reticulum, polysome localization
Afu1g16980	32	4.7234	2.14047	2.64912	Afu1g16980	Ortholog of A. nidulans FGSC A4 : AN0633, A. niger CBS 513.88 : An01g09880, A. oryzae RIB40 : AO090005000977, Aspergillus wentii : Aspwe1_0109484 and Aspergillus sydowii : Aspsy1_0055497
Afu1g15300	32	4.7234	2.14047	2.64912	Afu1g15300	Ortholog of A. nidulans FGSC A4 : AN0856, A. niger CBS 513.88 : An01g13290, A. oryzae RIB40 : AO090005001212, Aspergillus wentii : Aspwe1_0171741 and Aspergillus sydowii : Aspsy1_0083924
Afu1g04540	32	4.7234	2.14047	2.64912	Afu1g04540	NADH-cytochrome b5 reductase involved in oxidative phosphorylation; hypoxia induced protein; induced by exposure to artemisinin
Afu4g11540	37	4.72659	2.03209	2.65181	Afu4g11540	Putative glycerol kinase; transcript up-regulated in conidia exposed to neutrophils
Afu5g03710	34	4.73368	2.09581	2.6578	Afu5g03710	Ortholog of A. nidulans FGSC A4 : AN8235, A. niger CBS 513.88 : An09g06450, A. oryzae RIB40 : AO090102000581, Aspergillus wentii : Aspwe1_0043078 and Aspergillus sydowii : Aspsy1_0161939
Afu2g07800	33	4.74915	2.12235	2.67087	Afu2g07800	Putative glycophosphatidylinositol (GPI)-anchored cell wall protein; predicted adhesin-like protein
Afu2g16400	33	4.76055	2.125	2.68037	Afu2g16400	Translation initiation factor 4B
Afu1g12332	35	4.76492	2.08092	2.68413	Afu1g12332	Ortholog(s) have histone demethylase activity (H3-K36 specific) activity and role in histone demethylation, regulation of transcription by RNA polymerase II
Afu2g13840	53	4.76595	1.81452	2.68498	Afu2g13840	Ortholog of Aspergillus fumigatus A1163 : AFUB_029470
Afu2g03700	35	4.77583	2.08333	2.69311	hmg1	Hydroxymethylglutaryl-CoA (HMG-CoA) reductase; SrbA-regulated during hypoxia
Afu6g06800	34	4.80059	2.11098	2.71316	Afu6g06800	Putative peptidase; predicted signal sequence for secretion; induced by growth on BSA as a sole nitrogen source
Afu3g09810	38	4.80371	2.02914	2.71606	Afu3g09810	Ortholog(s) have role in intra-Golgi vesicle-mediated transport, protein localization by the Cvt pathway and Golgi transport complex localization
Afu7g03830	36	4.80816	2.06935	2.71989	rad7	DNA repair protein
Afu3g10140	37	4.81001	2.04962	2.72115	Afu3g10140	Ortholog of A. nidulans FGSC A4 : AN4974, A. niger CBS 513.88 : An16g03960, A. oryzae RIB40 : AO090003000548, Aspergillus wentii : Aspwe1_0036871 and Aspergillus sydowii : Aspsy1_0042909
Afu2g07730	33	4.81792	2.13836	2.72814	Afu2g07730	Has domain(s) with predicted phospholipid binding activity, role in cortical protein anchoring and cell cortex localization
Afu3g09230	35	4.81967	2.09302	2.72937	Afu3g09230	Putative carboxylesterase; protein level decreases upon heat shock
Afu4g08790	35	4.84173	2.0979	2.74699	Afu4g08790	Has domain(s) with predicted hydrolase activity
Afu7g03680	34	4.85703	2.12379	2.75983	Afu7g03680	Ortholog(s) have calcium ion binding, inositol-1,2,4,5,6-pentakisphosphate 5-phosphatase activity and inositol-1,2,4,5-tetrakisphosphate 5-phosphatase activity, more
Afu2g07670	34	4.85703	2.12379	2.75983	Afu2g07670	Ortholog(s) have G-protein beta/gamma-subunit complex binding, palmitoyltransferase activity
Afu2g11770	45	4.85984	1.9263	2.76228	Afu2g11770	Ortholog of A. nidulans FGSC A4 : AN6196, A. niger CBS 513.88 : An02g03790, A. oryzae RIB40 : AO090026000469, Aspergillus wentii : Aspwe1_0031226 and Aspergillus sydowii : Aspsy1_0045308
Afu3g07015	36	4.86213	2.08099	2.7643	aspE	Septin; unique to filamentous fungi; localizes to long tubular structures within hyphae and to newly formed septa
Afu6g10230	33	4.87596	2.1519	2.77519	Afu6g10230	Ortholog(s) have extracellular region localization
Afu5g06070	40	4.88743	2.0098	2.78493	mdr1	ABC multidrug transporter; transcript induced by voriconazole; biofilm growth regulated
Afu3g10760	33	4.89935	2.15736	2.79497	Afu3g10760	Putative phosphoketolase; calcium downregulated
Afu4g07690	36	4.90572	2.0904	2.80046	Afu4g07690	Putative phosphoribosylaminoimidazole-carboxamide formyltransferase/IMP cyclohydrolase; hypoxia repressed protein
Afu1g02260	35	4.90849	2.11268	2.80276	Afu1g02260	Ortholog of A. nidulans FGSC A4 : AN2152, AN0341, A. fumigatus Af293 : Afu2g15990, A. niger CBS 513.88 : An01g06000 and Aspergillus wentii : Aspwe1_0025648, Aspwe1_0026895
Afu1g13740	43	4.9165	1.96604	2.80955	Afu1g13740	Predicted pentafunctional polypeptide; predicted essential gene
Afu7g02260	36	4.91667	2.09276	2.80958	Afu7g02260	Ortholog of A. nidulans FGSC A4 : AN9087/oefA, A. niger CBS 513.88 : An12g00390, A. oryzae RIB40 : AO090038000604, Aspergillus wentii : Aspwe1_0113275 and Aspergillus sydowii : Aspsy1_0061396
Afu7g04450	38	4.91801	2.05263	2.81078	Afu7g04450	Has domain(s) with predicted role in signal transduction and intracellular localization
Afu8g05620	42	4.92479	1.98339	2.81683	chs3	Ortholog(s) have enzyme activator activity and role in cellular protein localization, division septum assembly, fungal-type cell wall chitin biosynthetic process, regulation of fungal-type cell wall beta-glucan biosynthetic process
Afu2g17920	36	4.92764	2.09513	2.81907	Afu2g17920	Ortholog of A. nidulans FGSC A4 : AN8550, A. niger CBS 513.88 : An02g13300, Neosartorya fischeri NRRL 181 : NFIA_093360, Aspergillus wentii : Aspwe1_0050028 and Aspergillus versicolor : Aspve1_0187913
Afu1g14230	33	4.93465	2.16561	2.82526	Afu1g14230	Ortholog of A. nidulans FGSC A4 : AN2423, AN0736, A. fumigatus Af293 : Afu2g13800, A. niger CBS 513.88 : An01g12240, An02g05360 and A. oryzae RIB40 : AO090026000195
Afu6g08380	33	4.94647	2.16837	2.83557	Afu6g08380	Ortholog of A. nidulans FGSC A4 : AN3926, A. niger CBS 513.88 : An11g01650, A. oryzae RIB40 : AO090003000092, Aspergillus wentii : Aspwe1_0045950 and Aspergillus sydowii : Aspsy1_0044421
Afu3g09680	35	4.95348	2.12264	2.84154	Afu3g09680	Ortholog(s) have role in cellular response to drug and extrinsic component of fungal-type vacuolar membrane, plasma membrane localization
Afu4g13600	47	4.95481	1.9154	2.8427	Afu4g13600	Has domain(s) with predicted nucleic acid binding, zinc ion binding activity
Afu8g04400	36	4.96071	2.10227	2.84745	Afu8g04400	Has domain(s) with predicted nucleic acid binding, nucleotide binding activity
Afu1g11780	37	4.97009	2.08333	2.85569	Afu1g11780	Ortholog of A. nidulans FGSC A4 : AN1116, A. niger CBS 513.88 : An08g03970, A. oryzae RIB40 : AO090038000243, Aspergillus wentii : Aspwe1_0109813 and Aspergillus sydowii : Aspsy1_0244584
Afu2g01850	36	4.97178	2.10466	2.85685	Afu2g01850	Ortholog(s) have role in cellular response to drug
Afu1g14930	34	4.9718	2.14988	2.85685	Afu1g14930	Ortholog of A. nidulans FGSC A4 : AN0833, A. oryzae RIB40 : AO090005001239, Aspergillus wentii : Aspwe1_0171773, Aspergillus sydowii : Aspsy1_0139633 and Aspergillus terreus NIH2624 : ATET_00857
Afu1g14650	37	5.0136	2.09251	2.89282	Afu1g14650	Ortholog(s) have role in single-species biofilm formation on inanimate substrate and cytosol, nucleus localization
Afu6g01840	33	5.02998	2.1879	2.90646	Afu6g01840	Has domain(s) with predicted DNA binding, DNA-binding transcription factor activity, RNA polymerase II-specific, zinc ion binding activity and role in regulation of transcription, DNA-templated, transcription, DNA-templated
Afu4g03270	33	5.04202	2.19072	2.91641	Afu4g03270	Ortholog of Aspergillus fumigatus A1163 : AFUB_099830
Afu3g08110	41	5.0455	2.02312	2.91936	Afu3g08110	Putative cell wall protein; transcript downregulated in response to amphotericin B and calcium
Afu4g06060	37	5.04647	2.09945	2.92016	Afu4g06060	Ortholog of A. nidulans FGSC A4 : AN4314, A. niger CBS 513.88 : An04g00300, A. oryzae RIB40 : AO090023000990, Aspergillus wentii : Aspwe1_0034783 and Aspergillus sydowii : Aspsy1_0073108
Afu8g04180	34	5.06546	2.17122	2.9362	Afu8g04180	Ortholog(s) have role in cellular response to glucose starvation and cytoplasm localization
Afu1g06900	35	5.06765	2.14797	2.93779	crzA	C2H2-type zinc finger transcription factor involved in calcium ion homeostasis; involved in regulation of conidial germination, hyphal growth, and virulence; mutants are sensitive to calcium and manganese ions
Afu6g08750	35	5.06765	2.14797	2.93779	Afu6g08750	Ortholog(s) have role in hyphal growth and mitochondrion localization
Afu5g10920	35	5.06765	2.14797	2.93779	Afu5g10920	Has domain(s) with predicted membrane localization
Afu2g09480	35	5.06765	2.14797	2.93779	Afu2g09480	Ortholog of A. nidulans FGSC A4 : AN5765, A. oryzae RIB40 : AO090011000718, Aspergillus flavus NRRL 3357 : AFL2T_05450 and Neosartorya fischeri NRRL 181 : NFIA_084970
Afu2g11170	39	5.06804	2.06398	2.93795	Afu2g11170	Has domain(s) with predicted nucleoside-triphosphatase activity, nucleotide binding activity
Afu5g08420	40	5.07105	2.04591	2.94059	sho1	Putative transmembrane osmosensor with homology to S. cerevisiae Sho1p; required for normal hyphal growth, condial germination, actin distribution and the response to oxidative stress; not required for invasive pulmonary infection
Afu4g11140	41	5.08615	2.03095	2.95313	Afu4g11140	Has domain(s) with predicted DNA-directed DNA polymerase activity, damaged DNA binding activity and role in DNA repair
Afu5g02540	34	5.10102	2.17933	2.95505	Afu5g02540	Ortholog of A. nidulans FGSC A4 : AN7996, A. niger CBS 513.88 : An02g10230, A. oryzae RIB40 : AO090102000369, Aspergillus wentii : Aspwe1_0029974 and Aspergillus sydowii : Aspsy1_0156606
Afu8g06700	33	5.10436	2.20534	2.95505	anxc3.1	Putative annexin; calcium induced
Afu8g02500	33	5.10436	2.20534	2.95505	Afu8g02500	Predicted glutathione S transferase
Afu6g08080	33	5.10436	2.20534	2.95505	Afu6g08080	Has domain(s) with predicted catalytic activity, hydrolase activity, hydrolyzing O-glycosyl compounds activity and role in polysaccharide metabolic process
Afu6g01870	33	5.10436	2.20534	2.95505	Afu6g01870	Ortholog of Aspergillus fumigatus A1163 : AFUB_096470
Afu5g09990	33	5.10436	2.20534	2.95505	Afu5g09990	Has domain(s) with predicted DNA binding, DNA-binding transcription factor activity, RNA polymerase II-specific, zinc ion binding activity and role in regulation of transcription, DNA-templated, transcription, DNA-templated
Afu2g17720	33	5.10436	2.20534	2.95505	Afu2g17720	Ortholog of A. niger CBS 513.88 : An09g01050, A. oryzae RIB40 : AO090012000372, Neosartorya fischeri NRRL 181 : NFIA_093110 and Aspergillus wentii : Aspwe1_0731661
Afu2g14510	33	5.10436	2.20534	2.95505	Afu2g14510	Ortholog of A. nidulans FGSC A4 : AN2391, A. niger CBS 513.88 : An02g00660, An07g03040, A. oryzae RIB40 : AO090023000055, AO090026000077, AO090020000644 and Aspergillus wentii : Aspwe1_0163838
Afu2g14260	33	5.10436	2.20534	2.95505	Afu2g14260	Ortholog of A. nidulans FGSC A4 : AN6342, A. niger CBS 513.88 : An02g01220, A. oryzae RIB40 : AO090023000107, Aspergillus wentii : Aspwe1_0045565 and Aspergillus sydowii : Aspsy1_0031691
Afu2g11490	33	5.10436	2.20534	2.95505	Afu2g11490	Ortholog(s) have acetyl-CoA:L-glutamate N-acetyltransferase activity, role in ornithine biosynthetic process and mitochondrial matrix, mitochondrial membrane localization
Afu1g02120	33	5.10436	2.20534	2.95505	Afu1g02120	Ortholog of A. nidulans FGSC A4 : AN0353, Neosartorya fischeri NRRL 181 : NFIA_022530, Aspergillus wentii : Aspwe1_0103055 and Aspergillus versicolor : Aspve1_0048604
Afu1g06160	35	5.11401	2.15827	2.96314	Afu1g06160	Ortholog of A. nidulans FGSC A4 : AN4237, A. niger CBS 513.88 : An18g05340, A. oryzae RIB40 : AO090001000437, Aspergillus wentii : Aspwe1_0026108 and Aspergillus sydowii : Aspsy1_0153979
Afu2g15830	38	5.12137	2.09452	2.96967	Afu2g15830	Has domain(s) with predicted ubiquitin-protein transferase activity, zinc ion binding activity and role in protein ubiquitination
Afu7g01600	40	5.13364	2.05823	2.98001	Afu7g01600	Ortholog of A. nidulans FGSC A4 : AN11181, A. niger CBS 513.88 : An12g01100, A. oryzae RIB40 : AO090038000529, Neosartorya fischeri NRRL 181 : NFIA_114300 and Aspergillus clavatus NRRL 1 : ACLA_065970
Afu1g11110	36	5.15203	2.14368	2.99518	cch1	Putative voltage-gated calcium channel
Afu2g15100	36	5.1635	2.14617	3.00479	Afu2g15100	Ortholog of A. nidulans FGSC A4 : AN5303, Neosartorya fischeri NRRL 181 : NFIA_090360, Aspergillus versicolor : Aspve1_0086623 and Aspergillus fumigatus A1163 : AFUB_030760
Afu1g17200	35	5.17252	2.17129	3.01283	sidC	Putative non-ribosomal peptide synthetase (NRPS) involved in ferricrocin siderophore biosynthesis; expression is up-regulated by iron starvation and downregulated under iron-replete conditions
Afu1g09750	38	5.17616	2.10583	3.01559	Afu1g09750	Putative aldehyde reductase; conidia-enriched protein
Afu1g03380	41	5.17872	2.04878	3.01791	Afu1g03380	Ortholog of A. nidulans FGSC A4 : AN0265, A. niger CBS 513.88 : An01g04760, A. oryzae RIB40 : AO090005000763, Aspergillus wentii : Aspwe1_0049645 and Aspergillus sydowii : Aspsy1_0027812
Afu2g05860	48	5.18809	1.94136	3.02565	pmr1	Putative golgi apparatus Ca2+/Mn2+ P-type ATPase; mutant shows increased expression of calcineurin pathway genes
Afu1g15690	35	5.19611	2.17654	3.03282	Afu1g15690	Ortholog of A. nidulans FGSC A4 : AN0903, A. niger CBS 513.88 : An01g14030, A. oryzae RIB40 : AO090005001138, Aspergillus wentii : Aspwe1_0027550 and Aspergillus sydowii : Aspsy1_0139000
Afu3g07270	36	5.19805	2.15367	3.03403	Afu3g07270	Ortholog of A. nidulans FGSC A4 : AN4834, A. niger CBS 513.88 : An02g13430, A. oryzae RIB40 : AO090020000197, Aspergillus wentii : Aspwe1_0052406 and Aspergillus sydowii : Aspsy1_0087772
Afu6g05260	35	5.20794	2.17918	3.04281	Afu6g05260	Ortholog(s) have mannose-ethanolamine phosphotransferase activity
Afu8g04550	39	5.21814	2.09424	3.0513	Afu8g04550	Has domain(s) with predicted catalytic activity and role in coenzyme M biosynthetic process
Afu3g14230	35	5.21979	2.18182	3.05265	Afu3g14230	Putative BAR adaptor protein: calcium induced
Afu2g12060	35	5.21979	2.18182	3.05265	Afu2g12060	Ortholog of A. nidulans FGSC A4 : AN6217, A. niger CBS 513.88 : An02g04130, A. oryzae RIB40 : AO090026000440, Aspergillus wentii : Aspwe1_0053972 and Aspergillus sydowii : Aspsy1_0152133
Afu1g01620	36	5.2212	2.15869	3.05325	Afu1g01620	Ortholog of Aspergillus wentii : Aspwe1_0154177 and Aspergillus fumigatus A1163 : AFUB_002020
Afu2g16230	49	5.23025	1.93498	3.06128	Afu2g16230	Has domain(s) with predicted DNA binding, nucleic acid binding, zinc ion binding activity, role in transcription, DNA-templated and nucleus localization
Afu1g11800	35	5.23168	2.18447	3.06219	Afu1g11800	Has domain(s) with predicted protein dimerization activity
Afu1g14070	39	5.23992	2.09864	3.06914	Afu1g14070	Ortholog of A. nidulans FGSC A4 : AN0715, A. niger CBS 513.88 : An01g11910, A. oryzae RIB40 : AO090012000454, Aspergillus wentii : Aspwe1_0110525 and Aspergillus sydowii : Aspsy1_0028467
Afu2g09650	35	5.24358	2.18712	3.07228	Afu2g09650	Aspartate transaminase; induced by L-tyrosine; transcript up-regulated in conidia exposed to neutrophils
Afu4g13330	42	5.27592	2.04957	3.09931	Afu4g13330	Ortholog(s) have ATP-dependent RNA helicase activity, RNA binding activity
Afu6g12980	35	5.27946	2.19512	3.1023	Afu6g12980	Ortholog(s) have microtubule plus end polymerase, microtubule plus-end binding activity
Afu3g12340	43	5.28082	2.03327	3.10352	Afu3g12340	Ortholog of A. nidulans FGSC A4 : AN3086, A. niger CBS 513.88 : An02g08040, Aspergillus wentii : Aspwe1_0370663, Aspergillus sydowii : Aspsy1_0087243 and Aspergillus terreus NIH2624 : ATET_04155
Afu3g13465	34	5.28241	2.22081	3.1046	Afu3g13465	Ortholog of A. nidulans FGSC A4 : AN3158, A. niger CBS 513.88 : An02g09340, Neosartorya fischeri NRRL 181 : NFIA_063880, Aspergillus wentii : Aspwe1_0025995 and Aspergillus versicolor : Aspve1_0081479
Afu1g06440	34	5.28241	2.22081	3.1046	Afu1g06440	Has domain(s) with predicted role in transmembrane transport and integral component of membrane localization
Afu1g05595	39	5.28372	2.10748	3.10565	Afu1g05595	Ortholog of A. nidulans FGSC A4 : AN4084, A. niger CBS 513.88 : An18g04440, A. oryzae RIB40 : AO090009000381, Aspergillus wentii : Aspwe1_0025280 and Aspergillus sydowii : Aspsy1_0149732
Afu1g06390	38	5.2874	2.12882	3.10896	tef1	Putative translation elongation factor EF-1 alpha subunit; protein abundant in conidia; protein induced by heat shock
Afu1g09070	35	5.29148	2.1978	3.1126	Afu1g09070	Ortholog of A. nidulans FGSC A4 : AN1374, A. niger CBS 513.88 : An08g00580, A. oryzae RIB40 : AO090005001598, Aspergillus wentii : Aspwe1_0065603 and Aspergillus sydowii : Aspsy1_0025369
Afu2g16150	38	5.29864	2.13115	3.11852	Afu2g16150	Has domain(s) with predicted nucleus localization
Afu5g10710	35	5.30351	2.20049	3.12305	Afu5g10710	Ortholog of A. niger CBS 513.88 : An14g03980, Neosartorya fischeri NRRL 181 : NFIA_076510, Aspergillus wentii : Aspwe1_0172590 and Aspergillus clavatus NRRL 1 : ACLA_013830
Afu4g09880	39	5.30575	2.11193	3.12461	Afu4g09880	Ortholog of A. nidulans FGSC A4 : AN1856, A. niger CBS 513.88 : An04g07170, Aspergillus wentii : Aspwe1_0034217, Aspergillus sydowii : Aspsy1_0026276 and Aspergillus terreus NIH2624 : ATET_00756
Afu5g04260	37	5.31676	2.15664	3.13401	Afu5g04260	Putative amino acid permease; predicted gene pair with AFUA_3G01560
Afu2g03120	38	5.33251	2.13816	3.14739	utr2	Putative cell wall glucanase; transcript induced by exposure to human airway epithelial cells
Afu1g14280	36	5.3503	2.18676	3.16303	Afu1g14280	Ortholog(s) have role in cellular response to pH and nucleus localization
Afu4g06480	35	5.38852	2.21948	3.19571	Afu4g06480	Has domain(s) with predicted role in intracellular signal transduction
Afu2g09070	34	5.39421	2.24647	3.20065	Afu2g09070	DUF221 domain protein; calcium induced
Afu1g09020	36	5.40998	2.19976	3.21394	Afu1g09020	Ortholog(s) have role in poly(A)+ mRNA export from nucleus and cytosol, nuclear periphery, nuclear pore localization
Afu4g07080	61	5.41456	1.82999	3.2178	dspC	Ortholog(s) have protein tyrosine phosphatase activity
Afu2g00770	34	5.41937	2.25225	3.2219	Afu2g00770	Has domain(s) with predicted FAD binding, oxidoreductase activity and role in metabolic process
Afu4g07680	36	5.42199	2.20238	3.22423	insA	Putative INSIG homolog, sterol sensing factor
Afu3g09690	35	5.42535	2.22772	3.22672	Afu3g09690	Laminin-binding protein with extracellular thaumatin domain; predicted adhesin-like protein; expression induced in biofilm; repressed by exposure to artemisinin
Afu1g14480	39	5.42845	2.13675	3.22971	Afu1g14480	Ortholog of Aspergillus fumigatus A1163 : AFUB_014010
Afu6g02530	34	5.43199	2.25515	3.23279	Afu6g02530	Ortholog(s) have 3' overhang single-stranded DNA endodeoxyribonuclease activity
Afu1g15360	35	5.43768	2.23048	3.23704	Afu1g15360	Has domain(s) with predicted FMN binding, oxidoreductase activity, riboflavin reductase (NADPH) activity and role in oxidation-reduction process
Afu3g10360	35	5.45003	2.23325	3.24735	Afu3g10360	Ortholog(s) have protein transporter activity and role in intracellular protein transport, protein retention in Golgi apparatus, retrograde transport, endosome to Golgi
Afu2g13270	34	5.45731	2.26098	3.25359	Afu2g13270	Has domain(s) with predicted oxidoreductase activity, transferase activity, transferring acyl groups other than amino-acyl groups, zinc ion binding activity and role in oxidation-reduction process
Afu6g02450	39	5.47372	2.14592	3.2671	Afu6g02450	Ortholog(s) have cytoplasmic stress granule localization
Afu3g10630	35	5.47483	2.23881	3.26794	Afu3g10630	Ortholog(s) have mitochondrion localization
Afu2g11830	38	5.49327	2.17149	3.27605	Afu2g11830	Ortholog of A. nidulans FGSC A4 : AN6201, A. oryzae RIB40 : AO090026000461, Neosartorya fischeri NRRL 181 : NFIA_087060, Aspergillus wentii : Aspwe1_0175601 and Aspergillus versicolor : Aspve1_0052426
Afu5g08050	35	5.48727	2.24159	3.27605	Afu5g08050	Putative aminopeptidase P
Afu8g04510	34	5.49734	2.2702	3.27605	Afu8g04510	Ortholog of A. nidulans FGSC A4 : AN1460, A. niger CBS 513.88 : An16g08480, A. oryzae RIB40 : AO090023000335, Aspergillus wentii : Aspwe1_0043882 and Aspergillus sydowii : Aspsy1_0145844
Afu8g04100	34	5.49734	2.2702	3.27605	Afu8g04100	Putative N-acetylglucosamine-6-phosphate deacetylase; predicted gene pair with AFUA_1G00450; transcript up-regulated in conidia exposed to neutrophils
Afu5g11470	34	5.49734	2.2702	3.27605	Afu5g11470	Ortholog(s) have double-stranded telomeric DNA binding activity, role in telomere maintenance and nuclear chromatin, nuclear chromosome, telomeric region localization
Afu5g06410	34	5.49734	2.2702	3.27605	Afu5g06410	Ortholog(s) have DNA-binding transcription factor activity, transcription regulatory region DNA binding activity and role in regulation of cellular amide catabolic process, transcription by RNA polymerase II
Afu5g03980	34	5.49734	2.2702	3.27605	Afu5g03980	Has domain(s) with predicted role in cell wall macromolecule catabolic process
Afu5g02120	34	5.49734	2.2702	3.27605	Afu5g02120	Ortholog of A. nidulans FGSC A4 : AN8051, A. niger CBS 513.88 : An02g11160, A. oryzae RIB40 : AO090003001306, Aspergillus wentii : Aspwe1_0029924 and Aspergillus sydowii : Aspsy1_0156226
Afu4g12980	34	5.49734	2.2702	3.27605	Afu4g12980	Ortholog of A. nidulans FGSC A4 : AN3582, A. niger CBS 513.88 : An01g08560, Aspergillus wentii : Aspwe1_0047266, Aspergillus sydowii : Aspsy1_0032701 and Aspergillus terreus NIH2624 : ATET_03180
Afu4g03750	34	5.49734	2.2702	3.27605	Afu4g03750	Has domain(s) with predicted role in transmembrane transport and integral component of membrane localization
Afu3g03490	34	5.49734	2.2702	3.27605	Afu3g03490	Has domain(s) with predicted O-methyltransferase activity
Afu3g01820	34	5.49734	2.2702	3.27605	Afu3g01820	Ortholog of Aspergillus fumigatus A1163 : AFUB_046590
Afu3g00800	34	5.49734	2.2702	3.27605	Afu3g00800	Predicted oxidoreductase, 2OG-Fe(II) oxygenase family protein; SrbA-regulated during hypoxia
Afu1g09770	34	5.49734	2.2702	3.27605	Afu1g09770	Ortholog of A. nidulans FGSC A4 : AN1288, A. niger CBS 513.88 : An08g01580, A. oryzae RIB40 : AO090012000866, Aspergillus wentii : Aspwe1_0036503 and Aspergillus sydowii : Aspsy1_0025457
Afu4g07090	55	5.51593	1.90606	3.29237	Afu4g07090	Ortholog of A. nidulans FGSC A4 : AN4418, A. niger CBS 513.88 : An04g01500, A. oryzae RIB40 : AO090023000866, Aspergillus wentii : Aspwe1_0167180 and Aspergillus sydowii : Aspsy1_0163356
Afu5g10580	39	5.53081	2.1575	3.30523	Afu5g10580	Ortholog of A. nidulans FGSC A4 : AN2318, A. niger CBS 513.88 : An14g04140, A. oryzae RIB40 : AO090010000479, Aspergillus wentii : Aspwe1_0106828 and Aspergillus sydowii : Aspsy1_0026806
Afu2g01610	39	5.53081	2.1575	3.30523	Afu2g01610	Ortholog of A. nidulans FGSC A4 : AN7690, A. niger CBS 513.88 : An03g04840, A. oryzae RIB40 : AO090701000787, Aspergillus wentii : Aspwe1_0112969 and Aspergillus sydowii : Aspsy1_0058707
Afu2g05050	38	5.54004	2.18121	3.31343	Afu2g05050	Ortholog of Aspergillus fumigatus A1163 : AFUB_022080
Afu1g16840	36	5.55582	2.2316	3.32661	Afu1g16840	TCTP family protein
Afu5g13070	42	5.56219	2.10372	3.33229	Afu5g13070	Ortholog of A. nidulans FGSC A4 : AN6859, A. niger CBS 513.88 : An14g06090, A. oryzae RIB40 : AO090120000432, Aspergillus wentii : Aspwe1_0107789 and Aspergillus sydowii : Aspsy1_0085559
Afu6g08040	37	5.5644	2.2093	3.33369	Afu6g08040	Has domain(s) with predicted nucleic acid binding, nucleotide binding activity
Afu4g07070	65	5.57991	1.81618	3.34679	Afu4g07070	Ortholog of A. nidulans FGSC A4 : AN10554, A. oryzae RIB40 : AO090023000869, Aspergillus wentii : Aspwe1_0248748, Aspergillus sydowii : Aspsy1_0547613 and Aspergillus terreus NIH2624 : ATET_05504
Afu1g07370	46	5.58232	2.03816	3.34878	Afu1g07370	Ortholog of Aspergillus fumigatus A1163 : AFUB_007720
Afu2g16060	35	5.58776	2.26415	3.3534	Afu2g16060	Ortholog of A. nidulans FGSC A4 : AN2145, A. fumigatus Af293 : Afu4g14200, A. niger CBS 513.88 : An13g01980, An15g06410, An02g04730 and A. oryzae RIB40 : AO090026000400, AO090012001029
Afu1g11940	54	5.62357	1.9339	3.3842	Afu1g11940	Ortholog(s) have structural constituent of ribosome activity and mitochondrial large ribosomal subunit localization
Afu5g12150	42	5.6277	2.11614	3.38738	Afu5g12150	Ortholog(s) have cytoplasm, plasma membrane localization
Afu2g13070	40	5.63771	2.15789	3.39609	Afu2g13070	Has domain(s) with predicted arginyltransferase activity and role in protein arginylation
Afu1g04890	38	5.6586	2.20588	3.41391	Afu1g04890	Ortholog(s) have ARF guanyl-nucleotide exchange factor activity, role in SRP-dependent cotranslational protein targeting to membrane and Ssh1 translocon complex localization
Afu3g06495	35	5.69005	2.28717	3.44092	Afu3g06495	Ortholog of A. nidulans FGSC A4 : AN4766, A. niger CBS 513.88 : An11g09830, Aspergillus wentii : Aspwe1_0029358, Aspergillus sydowii : Aspsy1_0087849 and Aspergillus terreus NIH2624 : ATET_08768
Afu1g15380	35	5.69005	2.28717	3.44092	Afu1g15380	Ortholog of A. nidulans FGSC A4 : AN10133, A. niger CBS 513.88 : An01g13650, Aspergillus wentii : Aspwe1_0482639 and Aspergillus sydowii : Aspsy1_0191721
Afu4g04070	41	5.69907	2.14944	3.44858	Afu4g04070	Protein of unknown function, phoB-regulated
Afu1g12500	42	5.70505	2.13082	3.45388	Afu1g12500	Ortholog of Aspergillus fumigatus A1163 : AFUB_011970
Afu1g05020	38	5.7067	2.21591	3.45502	Afu1g05020	Putative sulfate transporter
Afu6g03420	41	5.7104	2.15164	3.45849	Afu6g03420	Putative trehalase phosphorylase with a predicted role in the glucose-1-phosphate pathway; stuA-dependent up-regulation in developmentally competent hyphae
Afu1g11210	44	5.71188	2.09497	3.45987	Afu1g11210	Ortholog of Aspergillus fumigatus A1163 : AFUB_010640
Afu1g15900	51	5.71338	1.98625	3.46114	Afu1g15900	Ortholog(s) have mitotic spindle midzone, nuclear periphery localization
Afu8g04900	39	5.71726	2.19539	3.46432	Afu8g04900	Has domain(s) with predicted phosphatidylinositol binding activity and role in cell communication
Afu3g02430	39	5.71726	2.19539	3.46432	Afu3g02430	Ortholog of A. niger CBS 513.88 : An02g10610, Aspergillus tubingensis : Asptu1_0074938, Aspergillus brasiliensis : Aspbr1_0038097, Aspbr1_0207697 and Aspergillus flavus NRRL 3357 : AFL2T_08038
Afu6g04020	40	5.7649	2.18317	3.50566	Afu6g04020	Has domain(s) with predicted translation release factor activity and role in translational termination
Afu1g14750	44	5.76572	2.10477	3.50631	Afu1g14750	Ortholog(s) have role in positive regulation of ribosomal protein gene transcription by RNA polymerase II, regulation of cell size and cytoplasm, nucleus localization
Afu3g12790	35	5.8073	2.31362	3.54182	Afu3g12790	Transcript up-regulated in conidia exposed to neutrophils
Afu2g01180	35	5.8073	2.31362	3.54182	Afu2g01180	Has domain(s) with predicted flavin adenine dinucleotide binding, oxidoreductase activity, acting on CH-OH group of donors activity and role in oxidation-reduction process
Afu1g09270	37	5.82303	2.2646	3.55514	Afu1g09270	Ortholog(s) have role in cell morphogenesis, negative regulation of sexual sporulation resulting in formation of a cellular spore, phialide development, sexual sporulation resulting in formation of a cellular spore
Afu5g12560	36	5.83308	2.29244	3.56394	Afu5g12560	Ortholog of A. nidulans FGSC A4 : AN0048, A. niger CBS 513.88 : An14g06630, A. oryzae RIB40 : AO090120000382, Aspergillus wentii : Aspwe1_0026710 and Aspergillus sydowii : Aspsy1_0097984
Afu6g00640	41	5.83652	2.17617	3.56658	Afu6g00640	Ortholog of A. nidulans FGSC A4 : AN6413, AN6419, AN6946, AN5312, AN5664, AN8328, AN3241, AN10369, AN1930, AN2386, AN1738, AN11159, AN8984, AN8951, AN1540, AN8971, AN9387, AN9266, AN9306, AN1317, AN10886, AN7232, AN7774, AN12202
Afu2g02970	39	5.87312	2.22717	3.59751	Afu2g02970	Ortholog of Aspergillus fumigatus A1163 : AFUB_020030
Afu6g10650	40	5.89478	2.20905	3.61271	Afu6g10650	Putative ATP citrate lyase, subunit 1; protein induced by heat shock
Afu1g11100	37	5.89902	2.28091	3.61271	Afu1g11100	Ortholog of A. nidulans FGSC A4 : AN1169, A. niger CBS 513.88 : An08g03390, A. oryzae RIB40 : AO090038000299, Neosartorya fischeri NRRL 181 : NFIA_014530 and Aspergillus wentii : Aspwe1_0172243
Afu2g00660	35	5.90203	2.33506	3.61271	tcsB	Putative sensor histidine kinase/response regulator with homology to S. cerevisiae Sln1p
Afu8g00410	35	5.90203	2.33506	3.61271	metAP	Methionine aminopeptidase type II; required for mycotoxin synthesis; induced by growth on BSA as a sole nitrogen source; encoded in the fma (fumagillin) secondary metabolite gene cluster
Afu1g15780	35	5.90203	2.33506	3.61271	leu2A	3-isopropylmalate dehydrogenase with a predicted role in leucine biosynthesis; SrbA-regulated during hypoxia
Afu4g12970	35	5.90203	2.33506	3.61271	kexB	Pheromone processing endoprotease; predicted signal sequence for secretion
Afu4g01290	35	5.90203	2.33506	3.61271	csn	Glycosyl hydrolase family 75 chitosanase; hydrolyzes beta-1,4-glycosidic linkage of chitosan; repressed by exposure to artemisinin
Afu5g09750	35	5.90203	2.33506	3.61271	azgA	Purine transporter; high-affinity, high-capacity, purine/H+ symporter
Afu2g12630	35	5.90203	2.33506	3.61271	aspf13	Allergen Asp f 13; putative alkaline serine protease; higher expression in biofilm vs planktonic cells; transcript induced by growth on hydrogen peroxide
Afu8g06450	35	5.90203	2.33506	3.61271	Afu8g06450	Putative iron-sulfur cluster-binding protein, rieske family domain protein; transcript repressed by exposure to human airway epithelial cells
Afu7g06620	35	5.90203	2.33506	3.61271	Afu7g06620	Ortholog of Aspergillus fumigatus A1163 : AFUB_092190
Afu7g02120	35	5.90203	2.33506	3.61271	Afu7g02120	Ortholog of A. nidulans FGSC A4 : AN11174, A. niger CBS 513.88 : An12g00530, A. oryzae RIB40 : AO090038000590, Neosartorya fischeri NRRL 181 : NFIA_114850 and Aspergillus wentii : Aspwe1_0042354
Afu7g00940	35	5.90203	2.33506	3.61271	Afu7g00940	Has domain(s) with predicted UDP-N-acetylmuramate dehydrogenase activity, flavin adenine dinucleotide binding, oxidoreductase activity and role in oxidation-reduction process
Afu7g00780	35	5.90203	2.33506	3.61271	Afu7g00780	Has domain(s) with predicted role in transmembrane transport and integral component of membrane localization
Afu6g11420	35	5.90203	2.33506	3.61271	Afu6g11420	Ortholog of A. nidulans FGSC A4 : AN6205, A. niger CBS 513.88 : An05g02520, An02g13310, An08g07320 and A. oryzae RIB40 : AO090010000327, AO090103000241, AO090023000470
Afu6g03610	35	5.90203	2.33506	3.61271	Afu6g03610	Predicted DDE1 transposon-related ORF
Afu6g00510	35	5.90203	2.33506	3.61271	Afu6g00510	Has domain(s) with predicted oxidoreductase activity, transferase activity, transferring acyl groups other than amino-acyl groups, zinc ion binding activity and role in oxidation-reduction process
Afu5g09950	35	5.90203	2.33506	3.61271	Afu5g09950	Ortholog of A. nidulans FGSC A4 : AN10293, Aspergillus glaucus : Aspgl1_0181943, Aspergillus flavus NRRL 3357 : AFL2T_11694 and Neosartorya fischeri NRRL 181 : NFIA_077320
Afu3g14580	35	5.90203	2.33506	3.61271	Afu3g14580	Has domain(s) with predicted hydrolase activity and role in dUTP metabolic process
Afu3g10810	35	5.90203	2.33506	3.61271	Afu3g10810	Ortholog of A. nidulans FGSC A4 : AN4907, A. niger CBS 513.88 : An03g02970, Aspergillus wentii : Aspwe1_0362245, Aspergillus sydowii : Aspsy1_0043016 and Aspergillus terreus NIH2624 : ATET_04610
Afu3g10430	35	5.90203	2.33506	3.61271	Afu3g10430	Predicted DDE1 transposon-related ORF
Afu2g09570	35	5.90203	2.33506	3.61271	Afu2g09570	Ortholog(s) have role in cell volume homeostasis, cellular calcium ion homeostasis, regulation of resting membrane potential and cortical endoplasmic reticulum localization
Afu2g07870	35	5.90203	2.33506	3.61271	Afu2g07870	Patatin-like serine hydrolase; calcium induced
Afu2g04540	35	5.90203	2.33506	3.61271	Afu2g04540	Ortholog of A. nidulans FGSC A4 : AN7868, AN1866, A. niger CBS 513.88 : An04g07800, A. oryzae RIB40 : AO090003000256 and Neosartorya fischeri NRRL 181 : NFIA_057620, NFIA_081290
Afu1g12680	35	5.90203	2.33506	3.61271	Afu1g12680	Ortholog(s) have GTPase activator activity
Afu5g03420	37	5.91178	2.28365	3.62082	Afu5g03420	Ortholog of A. nidulans FGSC A4 : AN8899, AN12404, A. fumigatus Af293 : Afu2g01030, A. niger CBS 513.88 : An09g05780 and A. oryzae RIB40 : AO090102000551, AO090701000360
Afu6g12230	36	5.92408	2.3125	3.63153	Afu6g12230	Ortholog of A. nidulans FGSC A4 : AN4257, A. fumigatus Af293 : Afu7g04010, A. niger CBS 513.88 : An13g00460, An02g13770 and A. oryzae RIB40 : AO090026000813, AO090120000195
Afu7g06040	37	5.92456	2.2864	3.63178	Afu7g06040	Ortholog of S. cerevisiae : YLR050C, Aspergillus wentii : Aspwe1_0035527, Aspergillus sydowii : Aspsy1_0093107 and Aspergillus terreus NIH2624 : ATET_06330
Afu4g06770	38	5.92801	2.26218	3.63489	Afu4g06770	Ortholog(s) have 2 iron, 2 sulfur cluster binding, ferrous iron binding, iron-sulfur transferase activity and role in [2Fe-2S] cluster assembly, cellular iron ion homeostasis, tRNA wobble uridine modification
Afu3g02000	39	5.94641	2.24215	3.651	Afu3g02000	Putative C6 transcription factor; transcript up-regulated in conidia exposed to neutrophils
Afu4g11510	38	5.96569	2.27008	3.6673	srb1	GDP-mannose pyrophosphorylase, which catalyses the synthesis of GDP-mannose from GTP and mannose-1-phosphate in cell wall biosynthesis
Afu6g04480	40	5.97886	2.22584	3.67865	Afu6g04480	Predicted DDE1 transposon-related ORF
Afu4g03090	37	5.98889	2.30024	3.68772	Afu4g03090	Ortholog of A. nidulans FGSC A4 : AN2473, A. niger CBS 513.88 : An16g01740, An14g02280, A. oryzae RIB40 : AO090102000258, AO090003001331 and Aspergillus wentii : Aspwe1_0030474, Aspwe1_0115648
Afu4g10260	40	5.99097	2.22826	3.68902	Afu4g10260	Ortholog of A. nidulans FGSC A4 : AN2006, A. niger CBS 513.88 : An04g06660, A. oryzae RIB40 : AO090003001196, Aspergillus wentii : Aspwe1_0034162 and Aspergillus sydowii : Aspsy1_0142465
Afu1g13810	40	5.99097	2.22826	3.68902	Afu1g13810	Ortholog of Aspergillus fumigatus A1163 : AFUB_013290
Afu8g04910	38	5.99093	2.27538	3.68902	Afu8g04910	Ortholog of A. niger CBS 513.88 : An16g07900, A. oryzae RIB40 : AO090005000649, Aspergillus wentii : Aspwe1_0053737, Aspergillus sydowii : Aspsy1_0046365 and Aspergillus terreus NIH2624 : ATET_00115
Afu5g08740	41	6.00081	2.2082	3.69806	Afu5g08740	Ortholog(s) have palmitoyltransferase activity, role in protein palmitoylation, vacuole fusion, non-autophagic and fungal-type vacuole membrane localization
Afu6g13500	45	6.00371	2.12963	3.69991	Afu6g13500	Ortholog of A. nidulans FGSC A4 : AN5446, A. niger CBS 513.88 : An08g08820, A. oryzae RIB40 : AO090103000340, Neosartorya fischeri NRRL 181 : NFIA_059450 and Aspergillus versicolor : Aspve1_0084095
Afu1g10570	44	6.0082	2.149	3.70399	Afu1g10570	Putative glycerol-3-phosphate phosphatase
Afu5g12110	37	6.01481	2.30583	3.70977	Afu5g12110	Ortholog(s) have histone methyltransferase activity (H3-K79 specific), nucleosomal histone binding activity
Afu5g04060	36	6.01647	2.33291	3.71069	Afu5g04060	Ortholog(s) have ubiquitin conjugating enzyme activity
Afu7g02570	41	6.02463	2.21286	3.71825	Afu7g02570	Ortholog of A. nidulans FGSC A4 : AN9067/tinC, AN2167/hetC, A. fumigatus Af293 : Afu2g15840, A. niger CBS 513.88 : An15g06140 and A. oryzae RIB40 : AO090038000633, AO090012000230
Afu4g07390	38	6.029	2.28337	3.72169	Afu4g07390	Has domain(s) with predicted role in transport and integral component of membrane localization
Afu5g03290	39	6.03302	2.25989	3.72525	Afu5g03290	Ortholog of A. nidulans FGSC A4 : AN8197, A. niger CBS 513.88 : An09g05540, A. oryzae RIB40 : AO090102000532, Aspergillus wentii : Aspwe1_0115831 and Aspergillus sydowii : Aspsy1_0211779
Afu2g03510	42	6.03611	2.19388	3.72809	sxa2	Putative pheromone processing carboxypeptidase; predicted signal sequence for secretion
Afu3g04230	42	6.03611	2.19388	3.72809	Afu3g04230	Ortholog of A. oryzae RIB40 : AO090124000085, Aspergillus wentii : Aspwe1_0059976, Aspergillus sydowii : Aspsy1_0051663, Aspergillus terreus NIH2624 : ATET_04257 and Aspergillus glaucus : Aspgl1_0177433
Afu1g11920	40	6.03962	2.23799	3.73122	Afu1g11920	Ortholog(s) have role in establishment or maintenance of cell polarity and cell tip localization
Afu1g13340	38	6.06729	2.29142	3.75479	Afu1g13340	Has domain(s) with predicted integral component of membrane localization
Afu4g13070	39	6.07051	2.26757	3.75763	Afu4g13070	Ortholog of A. nidulans FGSC A4 : AN3006, Neosartorya fischeri NRRL 181 : NFIA_103280, Aspergillus versicolor : Aspve1_0032308 and Aspergillus niger ATCC 1015 : 52618-mRNA
Afu4g12750	36	6.08333	2.34772	3.76874	Afu4g12750	Ortholog(s) have role in deadenylation-dependent decapping of nuclear-transcribed mRNA, nuclear-transcribed mRNA poly(A) tail shortening and CCR4-NOT core complex, P-body localization
Afu3g11170	40	6.08865	2.24781	3.77338	Afu3g11170	Ortholog(s) have sequence-specific DNA binding activity and role in carotenoid biosynthetic process, circadian rhythm, conidiophore development
Afu7g01830	38	6.09295	2.29682	3.77733	ugp1	UTP-glucose-1-phosphate uridylyltransferase; induced by hydrogen peroxide; hypoxia repressed protein
Afu1g14410	37	6.09323	2.32274	3.77752	rpl17	60S ribosomal protein L17
Afu3g09110	41	6.10872	2.2293	3.79116	Afu3g09110	Ortholog of S. cerevisiae : APD1, A. nidulans FGSC A4 : AN11702, A. niger CBS 513.88 : An16g02680, A. oryzae RIB40 : AO090005001339 and Aspergillus wentii : Aspwe1_0041768
Afu6g06610	36	6.11027	2.35369	3.79242	Afu6g06610	Ortholog(s) have role in protein folding and endoplasmic reticulum localization
Afu2g10250	37	6.11959	2.32843	3.80082	Afu2g10250	Ortholog of Aspergillus glaucus : Aspgl1_0028034, Neosartorya fischeri NRRL 181 : NFIA_085650, Aspergillus wentii : Aspwe1_0648110 and Aspergillus fumigatus A1163 : AFUB_026060
Afu2g01700	37	6.13281	2.33129	3.81223	Afu2g01700	Ortholog(s) have AMP-activated protein kinase activity, ARF guanyl-nucleotide exchange factor activity
Afu5g13890	38	6.14459	2.30769	3.82253	Afu5g13890	Ortholog(s) have role in ATP export, asexual sporulation resulting in formation of a cellular spore, cellular response to pH, hyphal growth and intralumenal vesicle formation, more
Afu2g14810	39	6.14616	2.2831	3.82359	Afu2g14810	Ortholog(s) have peptidyl-proline dioxygenase activity
Afu2g12560	39	6.15886	2.28571	3.8348	Afu2g12560	Has domain(s) with predicted 4-alpha-hydroxytetrahydrobiopterin dehydratase activity and role in tetrahydrobiopterin biosynthetic process
Afu4g09780	38	6.19666	2.31867	3.86825	Afu4g09780	Protein of unknown function; transcript repressed by exposure to human airway epithelial cells
Afu2g16510	39	6.1971	2.29358	3.86834	Afu2g16510	Ortholog of A. nidulans FGSC A4 : AN7335, A. niger CBS 513.88 : An15g06990, A. oryzae RIB40 : AO090102000205, Aspergillus wentii : Aspwe1_0460265 and Aspergillus sydowii : Aspsy1_0169307
Afu2g12490	38	6.20974	2.32143	3.8795	Afu2g12490	Has domain(s) with predicted hydrolase activity and role in metabolic process
Afu1g12920	40	6.2129	2.27273	3.88206	glpV	Putative glycogen phosphorylase; transcript up-regulated in conidia exposed to neutrophils
Afu8g04280	36	6.21924	2.37789	3.88745	Afu8g04280	Ortholog of Aspergillus fumigatus A1163 : AFUB_083270
Afu2g05350	36	6.233	2.38095	3.8996	Afu2g05350	Putative MFS transporter
Afu1g01610	38	6.23598	2.32697	3.90209	Afu1g01610	Transcript up-regulated in conidia exposed to neutrophils
Afu6g02680	49	6.24661	2.10261	3.91151	Afu6g02680	Ortholog(s) have ubiquitin ligase complex localization
Afu3g13496	36	6.24678	2.38402	3.91151	Afu3g13496	Ortholog of Neosartorya fischeri NRRL 181 : NFIA_063840, Aspergillus versicolor : Aspve1_0032192, Aspergillus fumigatus A1163 : AFUB_035700 and Aspergillus clavatus NRRL 1 : ACLA_041640
Afu2g15990	43	6.2483	2.21328	3.91274	Afu2g15990	Ortholog of A. nidulans FGSC A4 : AN2152, AN0341, A. fumigatus Af293 : Afu1g02260, A. niger CBS 513.88 : An01g06000 and Aspergillus wentii : Aspwe1_0025648, Aspwe1_0026895
Afu2g05650	38	6.27556	2.33533	3.93576	Afu2g05650	Ortholog(s) have asparagine-tRNA ligase activity and role in asparaginyl-tRNA aminoacylation
Afu6g03580	37	6.28012	2.36318	3.93978	Afu6g03580	Ortholog(s) have ATP binding, ATPase activity, role in poly(A)+ mRNA export from nucleus, ribosomal small subunit biogenesis and cytoplasm, plasma membrane, polysome localization
Afu7g01840	44	6.28348	2.19941	3.94291	Afu7g01840	Ortholog(s) have Golgi apparatus, cell tip, cytoplasmic vesicle, plasma membrane localization
Afu4g10390	42	6.287	2.24192	3.94611	Afu4g10390	Ortholog of S. cerevisiae : RMD8, A. nidulans FGSC A4 : AN1996, A. niger CBS 513.88 : An04g06420, A. oryzae RIB40 : AO090003001178 and Aspergillus wentii : Aspwe1_0034138
Afu7g01280	36	6.30223	2.39637	3.95908	Afu7g01280	Ortholog(s) have role in DNA double-strand break processing, cellular response to oxidative stress, mitotic G2 DNA damage checkpoint and Mre11 complex, nucleus localization
Afu8g00840	36	6.31815	2.39992	3.9638	Afu8g00840	Ortholog of A. nidulans FGSC A4 : AN8990, A. oryzae RIB40 : AO090023000465, Neosartorya fischeri NRRL 181 : NFIA_094290 and Aspergillus wentii : Aspwe1_0046447, Aspwe1_0100493
Afu7g08410	36	6.31815	2.39992	3.9638	Afu7g08410	Predicted mariner Ant1 transposon-related ORF
Afu7g01870	36	6.31815	2.39992	3.9638	Afu7g01870	Ortholog(s) have histone acetyltransferase activity, methylated histone binding activity
Afu6g11810	36	6.31815	2.39992	3.9638	Afu6g11810	Has domain(s) with predicted role in response to stress and integral component of membrane localization
Afu6g07270	36	6.31815	2.39992	3.9638	Afu6g07270	Putative fatty acid CoA synthetase; induced by exposure to artemisinin
Afu6g02580	36	6.31815	2.39992	3.9638	Afu6g02580	Ortholog of A. nidulans FGSC A4 : AN3528, AN7149, A. fumigatus Af293 : Afu4g03620, A. niger CBS 513.88 : An14g01630, An04g09610 and A. oryzae RIB40 : AO090113000188, AO090011000275, AO090023000922
Afu5g02590	36	6.31815	2.39992	3.9638	Afu5g02590	Ortholog(s) have role in anaphase-promoting complex-dependent catabolic process, positive regulation of mitotic metaphase/anaphase transition and anaphase-promoting complex, nuclear pericentric heterochromatin localization
Afu3g14470	36	6.31815	2.39992	3.9638	Afu3g14470	Pyridoxal phosphate dependent enzyme; SrbA-regulated during hypoxia
Afu3g00430	36	6.31815	2.39992	3.9638	Afu3g00430	Has domain(s) with predicted transmembrane transporter activity, role in transmembrane transport and integral component of membrane, membrane localization
Afu2g16610	36	6.31815	2.39992	3.9638	Afu2g16610	Has domain(s) with predicted oxidoreductase activity and role in oxidation-reduction process
Afu2g07460	36	6.31815	2.39992	3.9638	Afu2g07460	Has domain(s) with predicted DNA binding, transcription coactivator activity and role in regulation of transcription, DNA-templated
Afu1g15440	41	6.3301	2.27273	3.97392	ags3	Putative alpha(1-3) glucan synthase; mutants show increased lung invasion and fungal burden in immunosuppressed mice, increased rate of germination, increased melanin production
Afu2g16870	37	6.33454	2.375	3.97765	Afu2g16870	Has domain(s) with predicted zinc ion binding activity
Afu6g08270	39	6.33928	2.32288	3.98169	Afu6g08270	Ortholog of Aspergillus fumigatus A1163 : AFUB_074230
Afu2g10550	53	6.35049	2.05793	3.99134	Afu2g10550	Protein of unknown function; calcium induced
Afu1g07050	38	6.35544	2.35223	3.99527	Afu1g07050	Ortholog of A. nidulans FGSC A4 : AN5157, A. niger CBS 513.88 : An07g09610, A. oryzae RIB40 : AO090012000957, Aspergillus wentii : Aspwe1_0051655 and Aspergillus sydowii : Aspsy1_0091619
Afu1g03650	41	6.36773	2.28013	4.00625	Afu1g03650	Ortholog of A. nidulans FGSC A4 : AN4026, A. niger CBS 513.88 : An18g04060, A. oryzae RIB40 : AO090003000980, Aspergillus wentii : Aspwe1_0169329 and Aspergillus sydowii : Aspsy1_0149715
Afu1g03040	40	6.37805	2.30596	4.01516	Afu1g03040	Ortholog(s) have role in hyphal growth, response to cold, response to heat, response to oxidative stress, response to salt stress, sporocarp development involved in sexual reproduction
Afu5g11170	41	6.38032	2.28261	4.01699	Afu5g11170	Has domain(s) with predicted ATP binding, DNA binding, helicase activity, nucleic acid binding activity
Afu1g11880	39	6.39177	2.33372	4.02687	Afu1g11880	Has domain(s) with predicted acetoacetate-CoA ligase activity, catalytic activity and role in lipid metabolic process, metabolic process
Afu1g10240	47	6.40663	2.16411	4.04016	Afu1g10240	Ortholog of Aspergillus fumigatus A1163 : AFUB_009650
Afu8g04630	38	6.40925	2.36364	4.04262	Afu8g04630	Ortholog(s) have malate:proton symporter activity, malonate(1-) transmembrane transporter activity, succinate:proton symporter activity
Afu3g12410	39	6.41817	2.33918	4.05044	Afu3g12410	Has domain(s) with predicted DNA binding, nucleic acid binding activity
Afu2g16550	43	6.42882	2.24719	4.06013	Afu2g16550	Ortholog of A. nidulans FGSC A4 : AN7328, A. niger CBS 513.88 : An03g03580, A. oryzae RIB40 : AO090102000183, Aspergillus wentii : Aspwe1_0039308 and Aspergillus sydowii : Aspsy1_0140287
Afu1g04960	47	6.42926	2.16802	4.06047	Afu1g04960	Ortholog of A. nidulans FGSC A4 : AN0409, A. niger CBS 513.88 : An01g04150, A. oryzae RIB40 : AO090003000840, Aspergillus wentii : Aspwe1_0103901 and Aspergillus sydowii : Aspsy1_0028019
Afu3g09240	39	6.43141	2.34192	4.06196	Afu3g09240	Has domain(s) with predicted catalytic activity and role in metabolic process
Afu5g02840	48	6.44563	2.1529	4.07457	Afu5g02840	Has domain(s) with predicted transmembrane transporter activity, role in transmembrane transport and integral component of membrane, membrane localization
Afu8g02030	38	6.4635	2.37515	4.09034	Afu8g02030	Ortholog of A. oryzae RIB40 : AO090038000195, AO090012000751, Aspergillus flavus NRRL 3357 : AFL2T_03620, Neosartorya fischeri NRRL 181 : NFIA_095700 and Aspergillus wentii : Aspwe1_0032065
Afu5g08830	44	6.47351	2.23436	4.09914	hexA	Putative woronin body protein; hypoxia repressed protein
Afu1g06020	41	6.48192	2.30263	4.10676	Afu1g06020	Ortholog of A. nidulans FGSC A4 : AN4206, A. niger CBS 513.88 : An18g03870, Aspergillus wentii : Aspwe1_0026071, Aspergillus sydowii : Aspsy1_0059171 and Aspergillus terreus NIH2624 : ATET_03025
Afu8g05470	40	6.48179	2.3269	4.10676	Afu8g05470	Ortholog of Aspergillus fumigatus A1163 : AFUB_082079
Afu4g09230	37	6.48663	2.40811	4.11083	Afu4g09230	Ortholog of A. nidulans FGSC A4 : AN1610, A. oryzae RIB40 : AO090023000613, Neosartorya fischeri NRRL 181 : NFIA_106900, Aspergillus wentii : Aspwe1_0166893 and Aspergillus versicolor : Aspve1_0440039
Afu6g07720	41	6.49473	2.30516	4.11838	acuF	Putative phosphoenolpyruvate carboxykinase; transcript up-regulated in conidia exposed to neutrophils; transcript downregulated in response to hypoxia
Afu2g05830	41	6.50757	2.30769	4.12936	acuK	Putative transcription factor involved in regulation of gluconeogenesis and acquisition of iron; required for virulence
Afu6g14130	37	6.51466	2.41423	4.1357	Afu6g14130	Ortholog(s) have role in negative regulation of chromatin silencing at silent mating-type cassette, negative regulation of chromatin silencing at telomere
Afu1g16710	37	6.51466	2.41423	4.1357	Afu1g16710	Has domain(s) with predicted integral component of membrane localization
Afu4g14240	38	6.51821	2.38678	4.13905	Afu4g14240	Has domain(s) with predicted O-methyltransferase activity
Afu3g09960	47	6.52052	2.1838	4.14084	aurA	Putative aureobasidin resistance protein; required for inositol phosphorylceramide (IPC) synthase activity
Afu8g05165	45	6.53106	2.22437	4.15048	Afu8g05165	Protein of unknown function
Afu2g04610	38	6.53196	2.38971	4.15121	Afu2g04610	Ortholog(s) have role in posttranslational protein targeting to endoplasmic reticulum membrane and TRC complex localization
Afu3g10520	51	6.53493	2.11726	4.15371	Afu3g10520	Ortholog(s) have nucleus localization
Afu2g16170	37	6.54282	2.42038	4.1612	Afu2g16170	Has domain(s) with predicted DNA binding, DNA-directed 5'-3' RNA polymerase activity, role in transcription by RNA polymerase III and RNA polymerase III complex localization
Afu5g09890	42	6.54778	2.29211	4.16522	Afu5g09890	Has domain(s) with predicted DNA-binding transcription factor activity, RNA polymerase II-specific, zinc ion binding activity, role in regulation of transcription, DNA-templated and nucleus localization
Afu4g11350	42	6.54778	2.29211	4.16522	Afu4g11350	Ortholog(s) have dehydrodolichyl diphosphate synthase activity, prenyltransferase activity, role in dolichol biosynthetic process and intrinsic component of membrane localization
Afu2g10760	50	6.54791	2.13568	4.16528	Afu2g10760	Has domain(s) with predicted hydrolase activity, hydrolase activity, acting on ester bonds activity and role in lipid metabolic process
Afu7g03710	40	6.56066	2.34286	4.17658	Afu7g03710	Ortholog(s) have ATP-dependent microtubule motor activity, plus-end-directed, microtubule plus-end binding activity
Afu2g11120	39	6.57883	2.37248	4.19273	Afu2g11120	Has domain(s) with predicted methyltransferase activity
Afu1g05130	39	6.57883	2.37248	4.19273	Afu1g05130	Has domain(s) with predicted phospholipid binding activity
Afu6g01960	49	6.59675	2.16076	4.20876	Afu6g01960	Has domain(s) with predicted DNA-binding transcription factor activity, RNA polymerase II-specific, zinc ion binding activity, role in regulation of transcription, DNA-templated and nucleus localization
Afu4g08890	37	6.62803	2.43902	4.23575	Afu4g08890	Has domain(s) with predicted oxidoreductase activity and role in oxidation-reduction process
Afu4g10150	39	6.64693	2.38664	4.25279	Afu4g10150	Ortholog(s) have alpha-1,4-glucosidase activity, glucosyltransferase activity, maltose alpha-glucosidase activity, starch alpha-glucosidase activity
Afu5g01970	46	6.64849	2.22538	4.25418	gpdA	Glyceraldehyde-3-phosphate dehydrogenase; predicted gene pair with AFUA_5G01030; protein induced by hydrogen peroxide; reacts with rabbit immunosera exposed to A. fumigatus conidia: induced by L-tyrosine
Afu2g15880	41	6.65036	2.33593	4.25586	Afu2g15880	Ortholog(s) have role in error-prone translesion synthesis
Afu3g12190	37	6.65667	2.4453	4.26116	Afu3g12190	Has domain(s) with predicted zinc ion binding activity
Afu4g04502	38	6.65699	2.41636	4.26119	Afu4g04502	Ortholog(s) have role in conidium formation, response to heat
Afu3g13140	38	6.65699	2.41636	4.26119	Afu3g13140	Ortholog(s) have intracellular localization
Afu3g12700	47	6.65967	2.20791	4.26378	glfB	Putative UDP-galactofuranose transporter
Afu1g12610	43	6.70255	2.29885	4.30075	hsp88	Hsp70 chaperone; conidia-enriched protein; induction in response to hydrogen peroxide Yap1-dependent
Afu1g05090	37	6.71434	2.45796	4.31119	Afu1g05090	Ortholog of Aspergillus fumigatus A1163 : AFUB_005440
Afu2g13660	41	6.71626	2.34899	4.31275	Afu2g13660	Ortholog of A. nidulans FGSC A4 : AN2411, A. niger CBS 513.88 : An02g05520, A. oryzae RIB40 : AO090026000242, Aspergillus wentii : Aspwe1_0045469 and Aspergillus sydowii : Aspsy1_0341196
Afu5g09630	44	6.71868	2.27964	4.31496	Afu5g09630	Ortholog of A. nidulans FGSC A4 : AN8798, A. niger CBS 513.88 : An07g03250, A. oryzae RIB40 : AO090020000592, Aspergillus wentii : Aspwe1_0023820 and Aspergillus sydowii : Aspsy1_0159494
Afu8g02410	37	6.74544	2.46479	4.33015	Afu8g02410	Has domain(s) with predicted prenyltransferase activity and integral component of membrane localization
Afu6g01800	37	6.74544	2.46479	4.33015	Afu6g01800	Putative endo-1,4 beta-glucanase, a predicted secreted hydrolase with a fungal cellulose binding domain
Afu5g14320	37	6.74544	2.46479	4.33015	Afu5g14320	Ortholog of A. nidulans FGSC A4 : AN2683, AN5069, A. fumigatus Af293 : Afu5g02860, A. niger CBS 513.88 : An09g04830, An14g05730 and A. oryzae RIB40 : AO090102000482, AO090001000197
Afu5g14200	37	6.74544	2.46479	4.33015	Afu5g14200	Ortholog of A. nidulans FGSC A4 : AN0196, A. fumigatus Af293 : Afu6g13810, Afu7g05110, Afu8g01720, A. niger CBS 513.88 : An13g02610, An15g02090, An04g09640 and A. oryzae RIB40 : AO090003001444
Afu4g14380	37	6.74544	2.46479	4.33015	Afu4g14380	Protein of unknown function; transcript downregulated in response to voriconazole
Afu4g06450	37	6.74544	2.46479	4.33015	Afu4g06450	Predicted DDE1 transposon-related ORF
Afu4g03790	37	6.74544	2.46479	4.33015	Afu4g03790	Putative serine peptidase, family S28; predicted signal sequence for secretion
Afu3g02310	37	6.74544	2.46479	4.33015	Afu3g02310	Pyrroline-5-carboxylate reductase; SrbA-regulated during hypoxia
Afu2g09010	37	6.74544	2.46479	4.33015	Afu2g09010	Ortholog(s) have DNA ligase (ATP) activity, role in DNA ligation, DNA repair, Okazaki fragment processing involved in mitotic DNA replication and mitochondrion, nucleus localization
Afu1g14530	37	6.74544	2.46479	4.33015	Afu1g14530	General amidase; induced by growth on BSA as a sole nitrogen source
Afu1g00530	37	6.74544	2.46479	4.33015	Afu1g00530	Thermoresistant gluconokinase family protein; predicted gene pair with AFUA_4G12050
Afu5g10660	45	6.74897	2.26378	4.33302	Afu5g10660	Pentatricopeptide repeat protein; transcript induced by exposure to human airway epithelial cells
Afu4g09210	39	6.75733	2.40964	4.34029	Afu4g09210	Has domain(s) with predicted role in transmembrane transport and integral component of membrane localization
Afu4g10200	43	6.7663	2.31092	4.34843	rfeF	Putative transcription factor; calcium induced
Afu2g05870	52	6.77165	2.13882	4.353	Afu2g05870	Ortholog of Aspergillus fumigatus A1163 : AFUB_022910
Afu5g02940	42	6.77952	2.33696	4.36006	Afu5g02940	Ortholog(s) have (R)-carnitine transmembrane transporter activity, choline transmembrane transporter activity, ethanolamine transmembrane transporter activity
Afu2g15180	46	6.78062	2.2488	4.36104	Afu2g15180	Ortholog of A. nidulans FGSC A4 : AN7587, A. niger CBS 513.88 : An09g03440, A. oryzae RIB40 : AO090012000301, Aspergillus wentii : Aspwe1_0054076 and Aspergillus sydowii : Aspsy1_0058595
Afu1g13240	56	6.78271	2.08029	4.36293	Afu1g13240	Ortholog(s) have adenine deaminase activity
Afu5g08820	45	6.79832	2.27273	4.37672	Afu5g08820	Ortholog of A. nidulans FGSC A4 : AN4696, A. niger CBS 513.88 : An07g04590, A. oryzae RIB40 : AO090020000448, Aspergillus wentii : Aspwe1_0023715 and Aspergillus sydowii : Aspsy1_0033180
Afu4g08960	44	6.80656	2.29592	4.38367	Afu4g08960	Putative glycophosphatidylinositol (GPI) anchored protein; predicted adhesin-like protein; calcium downregulated
Afu2g08780	38	6.81303	2.44975	4.38942	Afu2g08780	Has domain(s) with predicted ARF guanyl-nucleotide exchange factor activity, phospholipid binding activity and role in regulation of ARF protein signal transduction
Afu4g14400	42	6.81891	2.3446	4.39466	Afu4g14400	Ortholog of A. nidulans FGSC A4 : AN3546, A. fumigatus Af293 : Afu1g16170, Afu5g15040, Afu6g09300, A. niger CBS 513.88 : An08g11160, An04g08000 and A. oryzae RIB40 : AO090166000001
Afu2g04170	52	6.82659	2.14749	4.40179	Afu2g04170	Ortholog of A. nidulans FGSC A4 : AN1902, A. niger CBS 513.88 : An11g02270, A. oryzae RIB40 : AO090003000203, Aspergillus wentii : Aspwe1_0032670 and Aspergillus sydowii : Aspsy1_0026333
Afu2g17210	52	6.83763	2.14923	4.41184	Afu2g17210	Ortholog of Aspergillus fumigatus A1163 : AFUB_032860
Afu2g16440	38	6.85622	2.45902	4.42853	Afu2g16440	Ortholog of Aspergillus fumigatus A1163 : AFUB_032110
Afu2g10360	43	6.86951	2.33051	4.4408	Afu2g10360	Ortholog(s) have kynureninase activity and role in 'de novo' NAD biosynthetic process from tryptophan
Afu6g13380	42	6.87177	2.35487	4.44237	Afu6g13380	Ortholog of A. nidulans FGSC A4 : AN5453/artG, A. niger CBS 513.88 : An08g09040, A. oryzae RIB40 : AO090003000465, Aspergillus wentii : Aspwe1_0047105 and Aspergillus sydowii : Aspsy1_0044061
Afu5g07800	41	6.87704	2.38095	4.44706	Afu5g07800	Ortholog of A. nidulans FGSC A4 : AN7749, A. niger CBS 513.88 : An03g03800, A. oryzae RIB40 : AO090701000914, Aspergillus wentii : Aspwe1_0101068 and Aspergillus sydowii : Aspsy1_0058767
Afu1g16670	41	6.8906	2.38366	4.45882	Afu1g16670	Ortholog of Neosartorya fischeri NRRL 181 : NFIA_008720 and Aspergillus fumigatus A1163 : AFUB_016050
Afu1g10390	48	6.895	2.2293	4.46303	abcB	Putative ABC multidrug transporter; transcript induced by voriconazole
Afu4g13260	38	6.89968	2.46835	4.46684	Afu4g13260	Ortholog of A. nidulans FGSC A4 : AN1934, A. niger CBS 513.88 : An01g08930, A. oryzae RIB40 : AO090009000258, Aspergillus wentii : Aspwe1_0033794 and Aspergillus sydowii : Aspsy1_0139129
Afu2g12530	39	6.92635	2.44499	4.49146	Afu2g12530	Putative carnitine acetyl transferase with a predicted role in acetate metabolism; transcript up-regulated in conidia exposed to neutrophils
Afu2g11530	45	6.94844	2.3	4.51086	Afu2g11530	Ortholog of Aspergillus fumigatus A1163 : AFUB_027280
Afu4g11700	39	6.95493	2.45098	4.51677	Afu4g11700	Ortholog of A. nidulans FGSC A4 : AN5568, A. niger CBS 513.88 : An04g04540, A. oryzae RIB40 : AO090003001049, Aspergillus wentii : Aspwe1_0033982 and Aspergillus sydowii : Aspsy1_0879955
Afu4g09640	39	6.98362	2.457	4.54183	Afu4g09640	Ortholog(s) have double-stranded DNA binding activity, role in reciprocal meiotic recombination and condensed nuclear chromosome, nuclear chromatin localization
Afu5g08640	38	6.98744	2.48725	4.54504	Afu5g08640	Ortholog of A. nidulans FGSC A4 : AN10581, A. niger CBS 513.88 : An07g04900, Neosartorya fischeri NRRL 181 : NFIA_078640 and Aspergillus versicolor : Aspve1_0042746
Afu7g02040	46	7.00221	2.28822	4.55809	Afu7g02040	Ortholog(s) have triglyceride lipase activity, role in triglyceride catabolic process and mitochondrion localization
Afu2g02770	47	7.00749	2.26843	4.56286	Afu2g02770	Ortholog of A. nidulans FGSC A4 : AN4545, A. oryzae RIB40 : AO090026000849, Aspergillus wentii : Aspwe1_0105973, Aspergillus sydowii : Aspsy1_0059271 and Aspergillus terreus NIH2624 : ATET_09613
Afu4g08360	40	7.01153	2.43468	4.56666	Afu4g08360	Ortholog(s) have transcription coactivator activity, role in cellular protein localization and mediator complex localization
Afu7g00920	38	7.01694	2.49361	4.57119	Afu7g00920	Ortholog of A. nidulans FGSC A4 : AN6924, AN5943, AN8512, AN8548, AN0857, AN8661, AN4642 and A. fumigatus Af293 : Afu1g15290, Afu3g00850, Afu4g08850
Afu7g00330	39	7.04136	2.46914	4.59233	Afu7g00330	Ortholog of A. nidulans FGSC A4 : AN6239, AN6793, AN4948, A. fumigatus Af293 : Afu3g03390/sidJ, Afu3g10390, A. niger CBS 513.88 : An03g03530, An16g04320 and A. oryzae RIB40 : AO090103000170, AO090701000114
Afu5g06050	44	7.06374	2.34375	4.6123	Afu5g06050	Putative mannosyltransferase with a predicted role in glycosylphosphatidylinositol (GPI)-anchor biosynthesis; 10 predicted transmembrane domains
Afu3g06940	38	7.09124	2.50965	4.6365	Afu3g06940	Ortholog of A. oryzae RIB40 : AO090020000301, Neosartorya fischeri NRRL 181 : NFIA_070320 and Aspergillus fumigatus A1163 : AFUB_042120
Afu1g13050	39	7.09958	2.48139	4.64397	Afu1g13050	Has domain(s) with predicted nucleic acid binding activity
Afu3g08210	42	7.10091	2.39955	4.64508	Afu3g08210	Ortholog of A. nidulans FGSC A4 : AN2937, A. niger CBS 513.88 : An02g11760, Aspergillus wentii : Aspwe1_0029179 and Aspergillus sydowii : Aspsy1_0042633
Afu7g04400	38	7.1062	2.51289	4.64985	Afu7g04400	Ortholog of A. nidulans FGSC A4 : AN3743, AN5603, A. fumigatus Af293 : Afu4g11320, A. niger CBS 513.88 : An13g00980, An04g05280 and A. oryzae RIB40 : AO090005000127
Afu5g01840	41	7.1253	2.43056	4.66714	Afu5g01840	Protein of unknown function; calcium induced
Afu1g05830	39	7.12887	2.48756	4.67015	Afu1g05830	Ortholog(s) have extracellular region localization
Afu5g07720	41	7.13934	2.43337	4.67958	Afu5g07720	Ortholog(s) have role in generation of catalytic spliceosome for first transesterification step, snoRNA splicing and U2-type spliceosomal complex localization
Afu3g07630	56	7.1422	2.13323	4.68184	Afu3g07630	Putative dihydropteroate synthase
Afu2g10150	39	7.14356	2.49066	4.68302	pex1	Putative peroxisome biosynthesis protein; transcript up-regulated in conidia exposed to neutrophils
Afu5g00650	39	7.14356	2.49066	4.68302	Afu5g00650	Protein of unknown function; transcript induced by exposure to human airway epithelial cells
Afu1g10380	49	7.14391	2.25225	4.68331	nrps1	Non-ribosomal peptide synthetase (NRPS); essential for fumigaclavine C biosynthesis; mutant displays altered conidial surface morphology and hydrophilicity
Afu2g11620	38	7.15126	2.52264	4.69024	Afu2g11620	Has domain(s) with predicted catalytic activity, cation binding activity and role in carbohydrate metabolic process
Afu5g10510	39	7.17304	2.49688	4.70888	Afu5g10510	Ortholog(s) have role in secondary metabolite biosynthetic process
Afu1g09530	44	7.1825	2.36593	4.70962	Afu1g09530	Ortholog of A. nidulans FGSC A4 : AN10181, A. niger CBS 513.88 : An08g01090, A. oryzae RIB40 : AO090012000919, Neosartorya fischeri NRRL 181 : NFIA_016080 and Aspergillus wentii : Aspwe1_0036341
Afu1g16170	41	7.18165	2.44186	4.70962	Afu1g16170	Ortholog of A. nidulans FGSC A4 : AN3546, A. fumigatus Af293 : Afu4g14400, Afu5g15040, Afu6g09300, A. niger CBS 513.88 : An08g11160, An04g08000 and A. oryzae RIB40 : AO090166000001
Afu4g07130	38	7.18361	2.52965	4.70962	mvd1	Diphosphomevalonate decarboxylase; SrbA-regulated during hypoxia
Afu2g08060	38	7.18361	2.52965	4.70962	lah	Protein involved in tethering Woronin bodies to septal pore
Afu7g06650	38	7.18361	2.52965	4.70962	Afu7g06650	Has domain(s) with predicted catalytic activity
Afu5g14290	38	7.18361	2.52965	4.70962	Afu5g14290	Has domain(s) with predicted DNA binding, DNA-binding transcription factor activity, RNA polymerase II-specific, zinc ion binding activity and role in regulation of transcription, DNA-templated, transcription, DNA-templated
Afu5g06570	38	7.18361	2.52965	4.70962	Afu5g06570	Ortholog of A. nidulans FGSC A4 : AN2257, A. fumigatus Af293 : Afu3g14870, A. niger CBS 513.88 : An17g01080 and Neosartorya fischeri NRRL 181 : NFIA_036550, NFIA_062380
Afu5g06280	38	7.18361	2.52965	4.70962	Afu5g06280	Has domain(s) with predicted DNA binding, DNA-directed 5'-3' RNA polymerase activity, role in transcription, DNA-templated and nucleus localization
Afu3g12020	38	7.18361	2.52965	4.70962	Afu3g12020	Ortholog of A. nidulans FGSC A4 : AN0227, A. fumigatus Af293 : Afu5g10910, Afu4g06275, A. niger CBS 513.88 : An14g03700, An04g00590, An02g07840 and A. oryzae RIB40 : AO090010000440, AO090023000963
Afu3g09430	38	7.18361	2.52965	4.70962	Afu3g09430	Predicted LINE transposon-related ORF
Afu3g03030	38	7.18361	2.52965	4.70962	Afu3g03030	Has domain(s) with predicted catalytic activity, catechol 1,2-dioxygenase activity, ferric iron binding, iron ion binding and oxidoreductase activity, more
Afu2g16120	38	7.18361	2.52965	4.70962	Afu2g16120	Has domain(s) with predicted endoplasmic reticulum membrane localization
Afu2g08540	38	7.18361	2.52965	4.70962	Afu2g08540	Ortholog(s) have DNA-directed 5'-3' RNA polymerase activity, RNA-directed 5'-3' RNA polymerase activity
Afu2g08340	38	7.18361	2.52965	4.70962	Afu2g08340	Ortholog of A. nidulans FGSC A4 : AN6172, A. niger CBS 513.88 : An05g00970, A. oryzae RIB40 : AO090011000871, Aspergillus wentii : Aspwe1_0176098 and Aspergillus sydowii : Aspsy1_0151670
Afu2g03160	38	7.18361	2.52965	4.70962	Afu2g03160	Ortholog of A. nidulans FGSC A4 : AN4511, A. niger CBS 513.88 : An07g07590, A. oryzae RIB40 : AO090120000270, Aspergillus wentii : Aspwe1_0111310 and Aspergillus sydowii : Aspsy1_0163279
Afu2g00360	38	7.18361	2.52965	4.70962	Afu2g00360	Has domain(s) with predicted DNA binding, DNA-binding transcription factor activity, DNA-binding transcription factor activity, RNA polymerase II-specific, sequence-specific DNA binding, zinc ion binding activity
Afu1g17460	38	7.18361	2.52965	4.70962	Afu1g17460	Putative C6 transcription factor; calcium induced
Afu1g05480	38	7.18361	2.52965	4.70962	Afu1g05480	Predicted DDE1 transposon-related ORF
Afu1g17440	38	7.18361	2.52965	4.70962	abcA	ABC drug exporter
Afu3g07610	39	7.18782	2.5	4.71351	Afu3g07610	Ortholog of A. oryzae RIB40 : AO090020000132, Neosartorya fischeri NRRL 181 : NFIA_069560 and Aspergillus fumigatus A1163 : AFUB_041500
Afu6g08510	40	7.19744	2.47286	4.72184	crh1	Putative cell wall biosynthesis protein
Afu5g03430	40	7.19744	2.47286	4.72184	Afu5g03430	Ortholog(s) have histone demethylase activity (H3-trimethyl-K4 specific) activity
Afu4g12050	39	7.23235	2.50941	4.75274	Afu4g12050	Thermoresistant gluconokinase; predicted gene pair with AFUA_1G00530
Afu5g09200	44	7.24931	2.37844	4.76798	Afu5g09200	Ortholog(s) have protein homodimerization activity, ubiquitin protein ligase activity, ubiquitin-protein transferase activity
Afu7g08231	65	7.25648	2.03077	4.77453	Afu7g08231	Ortholog of Aspergillus fumigatus A1163 : AFUB_080320
Afu5g09900	40	7.27024	2.48786	4.78664	Afu5g09900	Has domain(s) with predicted role in response to stress and integral component of membrane localization
Afu7g05220	42	7.28116	2.43488	4.79676	Afu7g05220	Putative mitochondrial carrier protein
Afu6g02300	49	7.29025	2.27687	4.80472	Afu6g02300	Ortholog(s) have role in budding cell bud growth, morphogenesis checkpoint, protein autophosphorylation, septin ring assembly and cellular bud neck localization
Afu5g04180	44	7.34387	2.39617	4.85294	Afu5g04180	Transcript up-regulated in conidia exposed to neutrophils
Afu7g00340	41	7.36789	2.47934	4.87416	Afu7g00340	Has domain(s) with predicted hydrolase activity
Afu5g08090	40	7.37341	2.50918	4.87939	pyroA	Putative pyridoxine biosynthesis protein
Afu8g02070	49	7.37691	2.29148	4.88235	Afu8g02070	Ortholog of A. niger CBS 513.88 : An05g02310, A. oryzae RIB40 : AO090010000612, Neosartorya fischeri NRRL 181 : NFIA_095740 and Aspergillus clavatus NRRL 1 : ACLA_043710
Afu1g13800	44	7.39844	2.40642	4.90154	Afu1g13800	MFS multidrug transporter
Afu2g15640	40	7.41807	2.51843	4.91878	Afu2g15640	Has domain(s) with predicted integral component of membrane localization
Afu3g06050	41	7.42615	2.4911	4.92558	Afu3g06050	Ortholog(s) have role in filamentous growth of a population of unicellular organisms in response to biotic stimulus and growth of unicellular organism as a thread of attached cells, more
Afu1g12320	41	7.42615	2.4911	4.92558	Afu1g12320	Ortholog of Aspergillus fumigatus A1163 : AFUB_011790
Afu5g02710	39	7.42856	2.55102	4.92759	Afu5g02710	Protein of unknown function
Afu6g06830	44	7.43963	2.41416	4.93716	srb5	RNA polymerase II mediator complex subunit; transcript up-regulated in conidia exposed to neutrophils
Afu2g15165	48	7.4499	2.32448	4.94616	Afu2g15165	Ortholog of Aspergillus fumigatus A1163 : AFUB_030830
Afu5g05860	55	7.45876	2.19608	4.95377	Afu5g05860	Ortholog of A. nidulans FGSC A4 : AN8839, A. niger CBS 513.88 : An17g02060, Aspergillus wentii : Aspwe1_0099757 and Aspergillus sydowii : Aspsy1_0159021
Afu6g02110	46	7.46626	2.37134	4.96044	Afu6g02110	Has domain(s) with predicted DNA binding, protein dimerization activity
Afu4g08010	40	7.47805	2.53086	4.97121	odcA	Putative ornithine decarboxylase, a key enzyme in the biosynthesis of polyamines
Afu1g17180	41	7.49963	2.50597	4.99064	Afu1g17180	Putative pyridine nucleotide-disulphide oxidoreductase
Afu1g03210	52	7.50656	2.25532	4.99688	flbD	Myb family transcription factor; A. nidulans ortholog plays a role in conidiophore development; transcript repressed by growth in hypoxia
Afu1g05670	44	7.50877	2.42718	4.99841	Afu1g05670	Ortholog of A. nidulans FGSC A4 : AN12461, A. niger CBS 513.88 : An18g03360, A. oryzae RIB40 : AO090009000369, Aspergillus wentii : Aspwe1_0169284 and Aspergillus sydowii : Aspsy1_0057641, Aspsy1_0154889
Afu2g01410	46	7.53301	2.38337	5.02053	Afu2g01410	Ortholog of A. oryzae RIB40 : AO090701000824, Neosartorya fischeri NRRL 181 : NFIA_033720, Aspergillus wentii : Aspwe1_0041628 and Aspergillus versicolor : Aspve1_0090015
Afu7g04280	55	7.55067	2.20994	5.03598	Afu7g04280	Ortholog(s) have RNA binding, poly(U) RNA binding activity, role in mRNA splicing, via spliceosome and Lsm1-7-Pat1 complex, U4/U6 x U5 tri-snRNP complex, U6 snRNP, nucleolus, small nucleolar ribonucleoprotein complex localization
Afu3g04320	41	7.58878	2.52404	5.07002	Afu3g04320	Ortholog(s) have role in mitochondrion organization and SCF ubiquitin ligase complex localization
Afu8g05520	39	7.59881	2.58732	5.07865	Afu8g05520	Has domain(s) with predicted oxidoreductase activity, oxidoreductase activity, acting on the aldehyde or oxo group of donors, NAD or NADP as acceptor activity and role in oxidation-reduction process
Afu3g00900	53	7.5993	2.25188	5.07912	amyA	Putative alpha-amylase; transcript up-regulated in conidia exposed to neutrophils; transcript induced by exposure to human airway epithelial cells; preferentially expressed at neutral pH
Afu8g07190	41	7.60374	2.52708	5.08305	Afu8g07190	Ortholog of A. nidulans FGSC A4 : AN9163, A. niger CBS 513.88 : An14g07150, A. oryzae RIB40 : AO090138000059, Aspergillus wentii : Aspwe1_0078799 and Aspergillus sydowii : Aspsy1_0061494
Afu4g12320	42	7.61124	2.5	5.08934	Afu4g12320	Ortholog of A. nidulans FGSC A4 : AN3661, A. niger CBS 513.88 : An01g07625, Aspergillus wentii : Aspwe1_0102265, Aspwe1_0177914 and Aspergillus sydowii : Aspsy1_0154367
Afu1g13830	42	7.61124	2.5	5.08934	Afu1g13830	Ortholog of Aspergillus fumigatus A1163 : AFUB_013310
Afu1g05790	47	7.6213	2.37624	5.09829	Afu1g05790	Putative GPI-anchored protein
Afu4g11310	42	7.62592	2.50291	5.10195	fbp1	Fructose-1,6-bisphosphatase
Afu1g10760	39	7.63019	2.59403	5.10195	Afu1g10760	Ortholog(s) have role in cellular response to drug, ribosomal large subunit assembly and Noc1p-Noc2p complex localization
Afu3g04070	39	7.63243	2.59451	5.10195	hacA	bZIP transcription factor, major regulator of the unfolded protein response (UPR)
Afu6g08860	39	7.63243	2.59451	5.10195	Afu6g08860	Has domain(s) with predicted carbohydrate binding, carbohydrate derivative binding activity and role in carbohydrate derivative metabolic process, carbohydrate metabolic process
Afu5g00100	39	7.63243	2.59451	5.10195	Afu5g00100	Ortholog of A. nidulans FGSC A4 : AN9205, AN9209, A. fumigatus Af293 : Afu8g01840, Afu7g06523, A. niger CBS 513.88 : An05g01030, An13g03050, An16g01380 and A. oryzae RIB40 : AO090012000290, AO090011000069
Afu4g02790	39	7.63243	2.59451	5.10195	Afu4g02790	Has domain(s) with predicted hydrolase activity, acting on carbon-nitrogen (but not peptide) bonds activity and role in nitrogen compound metabolic process
Afu3g12780	39	7.63243	2.59451	5.10195	Afu3g12780	Has domain(s) with predicted DNA binding, DNA-binding transcription factor activity, RNA polymerase II-specific, zinc ion binding activity and role in regulation of transcription, DNA-templated, transcription, DNA-templated
Afu2g05900	39	7.63243	2.59451	5.10195	Afu2g05900	Ortholog(s) have protein deacetylase activity and role in chromatin silencing at centromere outer repeat region, chromatin silencing at rDNA, chromatin silencing at telomere, histone H3-K9 deacetylation, phenotypic switching
Afu3g08690	41	7.63374	2.53317	5.10309	Afu3g08690	Ortholog of A. nidulans FGSC A4 : AN3000, A. oryzae RIB40 : AO090005001398, Aspergillus wentii : Aspwe1_0184488, Aspergillus sydowii : Aspsy1_0087353 and Aspergillus terreus NIH2624 : ATET_01600
Afu3g08090	50	7.64386	2.31608	5.11221	Afu3g08090	Ortholog(s) have role in maturation of 5.8S rRNA from tricistronic rRNA transcript (SSU-rRNA, 5.8S rRNA, LSU-rRNA), maturation of LSU-rRNA from tricistronic rRNA transcript (SSU-rRNA, 5.8S rRNA, LSU-rRNA)
Afu3g12350	47	7.67472	2.38569	5.14013	Afu3g12350	Ortholog(s) have phosphatidic acid binding, phosphatidylinositol-3,5-bisphosphate binding, phosphatidylinositol-3-phosphate binding, sphingolipid binding activity
Afu1g10575	47	7.70156	2.39044	5.16439	Afu1g10575	Protein of unknown function
Afu6g14050	45	7.7061	2.43902	5.1686	Afu6g14050	Has domain(s) with predicted UDP-N-acetylmuramate dehydrogenase activity, flavin adenine dinucleotide binding activity and role in oxidation-reduction process
Afu4g09120	44	7.72002	2.46711	5.18145	Afu4g09120	Has domain(s) with predicted GTPase activator activity, zinc ion binding activity
Afu5g02280	44	7.79173	2.48071	5.24637	eng4	Has domain(s) with predicted hydrolase activity, hydrolyzing O-glycosyl compounds activity and role in carbohydrate metabolic process
Afu6g11190	43	7.81101	2.51142	5.26382	Afu6g11190	Ortholog(s) have protein serine/threonine kinase activity, ubiquitin binding activity
Afu2g10170	45	7.84708	2.46517	5.29604	Afu2g10170	Protein of unknown function identified by mass spectrometry
Afu6g05080	40	7.84839	2.60814	5.29686	Afu6g05080	Has domain(s) with predicted ATP binding, ATPase activity, nucleoside-triphosphatase activity, nucleotide binding activity
Afu2g04880	48	7.85662	2.39492	5.30393	Afu2g04880	Ortholog of A. nidulans FGSC A4 : AN10243, A. fumigatus Af293 : Afu4g09900, A. oryzae RIB40 : AO090003001243, Aspergillus wentii : Aspwe1_0072976, Aspwe1_0166814 and Aspergillus sydowii : Aspsy1_0141212
Afu5g13300	40	7.88008	2.6148	5.32442	pep1	Putative extracellular aspartic endopeptidase; acid protease; predicted signal sequence for secretion; allergen Asp f 10; transcript induced by growth on hydrogen peroxide and by growth on BSA as a sole nitrogen source
Afu6g10300	43	7.88508	2.52583	5.32888	aspf28	Allergen Asp f 28; putative thioredoxin
Afu2g03940	44	7.9813	2.51678	5.41438	Afu2g03940	Ortholog of Aspergillus fumigatus A1163 : AFUB_021010
Afu6g06860	65	7.9995	2.12629	5.43088	rgsA	G-protein signal regulator with an RGS domain
Afu1g02710	41	8.01914	2.61194	5.44867	Afu1g02710	Ortholog(s) have mitochondrial outer membrane localization
Afu2g16330	42	8.03335	2.58413	5.46147	Afu2g16330	Putative hexokinase
Afu4g06520	43	8.03532	2.55517	5.46311	Afu4g06520	Ortholog of A. nidulans FGSC A4 : AN4364, A. niger CBS 513.88 : An04g00860, A. oryzae RIB40 : AO090023000934, Aspergillus wentii : Aspwe1_0252118 and Aspergillus sydowii : Aspsy1_0062282
Afu3g14410	54	8.05803	2.30511	5.4838	Afu3g14410	Ortholog of A. nidulans FGSC A4 : AN2522, A. niger CBS 513.88 : An09g04050, A. oryzae RIB40 : AO090701000592, Aspergillus wentii : Aspwe1_0073746 and Aspergillus sydowii : Aspsy1_0146188
Afu1g15940	45	8.07796	2.50818	5.50229	Afu1g15940	Has domain(s) with predicted role in transmembrane transport and integral component of membrane localization
Afu7g05570	40	8.09165	2.65938	5.50873	Afu7g05570	Ortholog of Aspergillus fumigatus A1163 : AFUB_091150
Afu4g14390	40	8.09165	2.65938	5.50873	Afu4g14390	Predicted DDE1 transposon-related ORF
Afu4g00780	40	8.09165	2.65938	5.50873	Afu4g00780	Predicted DDE1 transposon-related ORF
Afu3g14670	40	8.09165	2.65938	5.50873	Afu3g14670	Has domain(s) with predicted role in transmembrane transport and integral component of membrane localization
Afu3g04060	40	8.09165	2.65938	5.50873	Afu3g04060	Ortholog(s) have role in late endosome to vacuole transport via multivesicular body sorting pathway and endosome localization
Afu3g01640	40	8.09165	2.65938	5.50873	Afu3g01640	Has domain(s) with predicted DNA-binding transcription factor activity, RNA polymerase II-specific, zinc ion binding activity, role in regulation of transcription, DNA-templated and nucleus localization
Afu2g00650	40	8.09165	2.65938	5.50873	Afu2g00650	Putative secreted arabinosidase
Afu1g10280	40	8.09165	2.65938	5.50873	Afu1g10280	Ortholog(s) have role in ATP-dependent chromatin remodeling, positive regulation of cellular response to phosphate starvation, regulation of nucleosome density and Ino80 complex localization
Afu1g03170	40	8.09165	2.65938	5.50873	Afu1g03170	Has domain(s) with predicted hydrolase activity, hydrolase activity, acting on ester bonds activity and role in lipid metabolic process
Afu6g03940	42	8.09556	2.59662	5.51219	Afu6g03940	Has domain(s) with predicted intracellular localization
Afu5g08900	41	8.11456	2.63158	5.52944	Afu5g08900	Putative d-arabitinol dehydrogenase
Afu7g04590	48	8.13033	2.44267	5.54397	Afu7g04590	Ortholog(s) have telomerase RNA binding, telomerase RNA reverse transcriptase activity and role in DNA strand elongation, telomere maintenance via telomerase
Afu3g10940	54	8.13314	2.31677	5.54634	pex19	Ortholog of A. nidulans FGSC A4 : AN4899, A. oryzae RIB40 : AO090003000644, Aspergillus wentii : Aspwe1_0362912, Aspergillus sydowii : Aspsy1_0793863 and Aspergillus terreus NIH2624 : ATET_04619
Afu3g00490	41	8.19496	2.64817	5.60293	Afu3g00490	Has domain(s) with predicted DNA-binding transcription factor activity, RNA polymerase II-specific, zinc ion binding activity, role in regulation of transcription, DNA-templated and nucleus localization
Afu2g04070	52	8.19692	2.36607	5.60466	Afu2g04070	Has domain(s) with predicted role in transmembrane transport and integral component of membrane localization
Afu4g11120	48	8.20019	2.45491	5.60772	Afu4g11120	Ortholog of Aspergillus fumigatus A1163 : AFUB_068150
Afu3g12400	44	8.23617	2.56556	5.63973	ganA	Putative heterotrimeric G protein alpha subunit
Afu2g13820	45	8.25555	2.54144	5.65738	Afu2g13820	Has domain(s) with predicted nucleic acid binding activity
Afu6g02970	43	8.3288	2.61283	5.72236	Afu6g02970	Putative UPF0041 domain protein
Afu1g00550	61	8.33225	2.22701	5.72541	Afu1g00550	Protein of unknown function: predicted gene pair with AFUA_1G00910
Afu5g08320	45	8.3458	2.5584	5.73734	Afu5g08320	Ortholog of A. nidulans FGSC A4 : AN7705, A. niger CBS 513.88 : An03g04590, A. oryzae RIB40 : AO090701000755, Aspergillus wentii : Aspwe1_0167600 and Aspergillus sydowii : Aspsy1_0090398
Afu1g12600	47	8.38864	2.51309	5.77668	chsD	Putative chitin synthase-like gene with a predicted role in chitin biosynthesis
Afu7g02220	46	8.41078	2.54329	5.79656	Afu7g02220	Ortholog of A. nidulans FGSC A4 : AN9091, A. niger CBS 513.88 : An12g00440, Aspergillus wentii : Aspwe1_0042339, Aspergillus sydowii : Aspsy1_0120658 and Aspergillus terreus NIH2624 : ATET_01854
Afu2g02730	44	8.421	2.60116	5.8063	Afu2g02730	Ortholog of A. nidulans FGSC A4 : AN4542, A. niger CBS 513.88 : An07g07060, A. oryzae RIB40 : AO090026000848, Aspergillus wentii : Aspwe1_0168873 and Aspergillus sydowii : Aspsy1_0091100
Afu4g07350	45	8.42177	2.57271	5.80701	Afu4g07350	Has domain(s) with predicted oxidoreductase activity, acting on the CH-CH group of donors activity, role in lipid metabolic process and cytoplasm, integral component of membrane localization
Afu3g12690	51	8.43002	2.42537	5.81411	glfA	Putative UDP-galactopyranose mutase, enzyme in the first step of galactofuranose biosynthesis; mutant unmasks mannan residues on the cell surface, which is thought to contribute to increased cell adhesion
Afu3g03320	41	8.49129	2.70968	5.86971	Afu3g03320	Has domain(s) with predicted role in transmembrane transport and integral component of membrane localization
Afu5g10950	49	8.4969	2.48262	5.8752	Afu5g10950	Ortholog of A. nidulans FGSC A4 : AN0213, A. niger CBS 513.88 : An14g02320, A. oryzae RIB40 : AO090010000435, Aspergillus wentii : Aspwe1_0440942 and Aspergillus sydowii : Aspsy1_0085799
Afu2g13175	45	8.49844	2.58718	5.87653	Afu2g13175	Ortholog of Aspergillus fumigatus A1163 : AFUB_028810
Afu4g09590	41	8.50807	2.71318	5.8852	Afu4g09590	Ortholog of A. nidulans FGSC A4 : AN1828, A. oryzae RIB40 : AO090003001283, Aspergillus wentii : Aspwe1_0022932 and Aspergillus terreus NIH2624 : ATET_00787
Afu2g10180	46	8.51604	2.5627	5.89258	Afu2g10180	Ortholog of Aspergillus fumigatus A1163 : AFUB_025990
Afu2g02240	43	8.51976	2.6506	5.89602	Afu2g02240	Has domain(s) with predicted role in vacuolar proton-transporting V-type ATPase complex assembly
Afu1g00540	56	8.52922	2.3399	5.9047	Afu1g00540	Has domain(s) with predicted hydrolase activity, hydrolyzing O-glycosyl compounds activity and role in carbohydrate metabolic process
Afu8g01670	41	8.56105	2.72424	5.92841	cat2	Putative bifunctional catalase-peroxidase; induction in response to hydrogen peroxide Yap1-dependent; transcript induced by exposure to human airway epithelial cells; SrbA-regulated during hypoxia
Afu8g01300	41	8.56105	2.72424	5.92841	Afu8g01300	Ortholog of A. nidulans FGSC A4 : AN1465, AN8786, A. fumigatus Af293 : Afu8g04560, A. niger CBS 513.88 : An16g08420 and Aspergillus wentii : Aspwe1_0030845
Afu3g01390	41	8.56105	2.72424	5.92841	Afu3g01390	Protein of unknown function
Afu2g10930	41	8.56105	2.72424	5.92841	Afu2g10930	Ortholog(s) have role in protein retention in ER lumen, retrograde vesicle-mediated transport, Golgi to ER and COPI-coated vesicle, COPII-coated ER to Golgi transport vesicle, Golgi cisterna, fungal-type vacuole localization
Afu4g12490	46	8.57678	2.57393	5.94294	Afu4g12490	Ortholog of A. nidulans FGSC A4 : AN3678, A. niger CBS 513.88 : An01g07920, A. oryzae RIB40 : AO090009000462, Aspergillus wentii : Aspwe1_0033898 and Aspergillus sydowii : Aspsy1_0046608
Afu7g00410	43	8.64956	2.6764	6.00843	Afu7g00410	Has domain(s) with predicted DNA-binding transcription factor activity, RNA polymerase II-specific, zinc ion binding activity, role in regulation of transcription, DNA-templated and nucleus localization
Afu3g12300	48	8.69121	2.54149	6.04604	Afu3g12300	60S ribosomal protein L22
Afu3g11850	42	8.69491	2.71808	6.04935	Afu3g11850	Ortholog of A. nidulans FGSC A4 : AN2863, A. niger CBS 513.88 : An02g07670, A. oryzae RIB40 : AO090003000748, Neosartorya fischeri NRRL 181 : NFIA_065470 and Aspergillus wentii : Aspwe1_0037077
Afu6g09307	48	8.72099	2.54678	6.07307	Afu6g09307	Has domain(s) with predicted catalytic activity, chitin binding, chitinase activity, hydrolase activity, hydrolyzing O-glycosyl compounds activity and role in carbohydrate metabolic process, chitin catabolic process
Afu6g07460	48	8.72099	2.54678	6.07307	Afu6g07460	Ortholog of A. nidulans FGSC A4 : AN5212, A. niger CBS 513.88 : An07g08970, Aspergillus wentii : Aspwe1_0028223, Aspergillus sydowii : Aspsy1_0033560 and Aspergillus terreus NIH2624 : ATET_03679
Afu6g03900	43	8.74824	2.69608	6.0982	Afu6g03900	Ortholog of A. nidulans FGSC A4 : AN6625, A. niger CBS 513.88 : An15g01620, A. oryzae RIB40 : AO090701000157, Aspergillus wentii : Aspwe1_0024331 and Aspergillus sydowii : Aspsy1_0092034
Afu4g10210	48	8.76584	2.55474	6.11372	Afu4g10210	Ortholog(s) have phospholipid-translocating ATPase activity and role in intracellular protein transport, phospholipid translocation, response to pheromone triggering conjugation with cellular fusion
Afu6g02330	55	8.79224	2.39931	6.13832	Afu6g02330	Has domain(s) with predicted DNA-binding transcription factor activity, RNA polymerase II-specific, zinc ion binding activity, role in regulation of transcription, DNA-templated and nucleus localization
Afu4g10090	46	8.79283	2.61402	6.13867	Afu4g10090	Ortholog of A. nidulans FGSC A4 : AN3304, AN2043, A. fumigatus Af293 : Afu4g01230 and A. niger CBS 513.88 : An03g00230, An04g06970, An16g01920, An13g01860, An05g01440
Afu1g09130	48	8.79587	2.56008	6.14149	Afu1g09130	Protein of unknown function identified by mass spectrometry
Afu5g03230	46	8.82414	2.61984	6.16668	Afu5g03230	Has domain(s) with predicted integral component of membrane localization
Afu3g13440	47	8.85431	2.5974	6.19409	Afu3g13440	Stomatin family protein; hypoxia induced protein
Afu8g05950	44	8.86888	2.68817	6.20767	Afu8g05950	Ortholog of A. nidulans FGSC A4 : AN1574, AN0682, A. fumigatus Af293 : Afu1g13430, A. niger CBS 513.88 : An09g02840 and A. oryzae RIB40 : AO090012000536
Afu5g03730	51	8.87866	2.5	6.2169	Afu5g03730	Protein of unknown function; calcium induced
Afu8g04130	50	8.88327	2.52475	6.2211	farB1	Putative C6 transcription factor with a predicted role in beta oxidation of fatty acids; transcript up-regulated in conidia exposed to neutrophils
Afu5g10940	49	8.90582	2.55363	6.24163	Afu5g10940	Ortholog of A. nidulans FGSC A4 : AN8455, A. fumigatus Af293 : Afu5g10960, Neosartorya fischeri NRRL 181 : NFIA_076300, Aspergillus wentii : Aspwe1_0041244 and Aspergillus versicolor : Aspve1_0042580
Afu1g04690	50	8.94203	2.53479	6.27521	Afu1g04690	Ortholog of A. nidulans FGSC A4 : AN0448, A. niger CBS 513.88 : An01g03390, A. oryzae RIB40 : AO090003000900, Aspergillus wentii : Aspwe1_0037393 and Aspergillus sydowii : Aspsy1_0055292
Afu4g14230	43	8.94913	2.73632	6.28193	Afu4g14230	Has domain(s) with predicted role in transmembrane transport and integral component of membrane localization
Afu8g04050	65	9.02063	2.25873	6.34718	Afu8g04050	Putative DNA binding transcription factor; predicted gene pair with AFUA_1G00580
Afu8g02190	42	9.04038	2.7891	6.36029	Afu8g02190	Ortholog of Aspergillus fumigatus A1163 : AFUB_084420
Afu6g13250	42	9.04038	2.7891	6.36029	Afu6g13250	60S ribosomal protein L31e; transcript induced by exposure to human airway epithelial cells
Afu1g11540	42	9.04038	2.7891	6.36029	Afu1g11540	Ortholog of A. niger CBS 513.88 : An08g03660, A. oryzae RIB40 : AO090038000270, Aspergillus wentii : Aspwe1_0040553 and Aspergillus sydowii : Aspsy1_0025614
Afu1g05110	42	9.04038	2.7891	6.36029	Afu1g05110	Ortholog(s) have RNA binding activity and role in poly(A)+ mRNA export from nucleus, ribosomal large subunit export from nucleus, ribosomal small subunit export from nucleus
Afu3g12320	49	9.08701	2.58532	6.4028	Afu3g12320	Ortholog of A. nidulans FGSC A4 : AN3084, A. niger CBS 513.88 : An02g08060, A. oryzae RIB40 : AO090005000735, Aspergillus wentii : Aspwe1_0049377 and Aspergillus sydowii : Aspsy1_0056187
Afu1g15290	52	9.09129	2.51185	6.40647	Afu1g15290	Ortholog of A. nidulans FGSC A4 : AN6924, AN5943, AN8512, AN8548, AN0857, AN8661, AN4642 and A. fumigatus Af293 : Afu3g00850, Afu4g08850, Afu7g00920
Afu5g09010	53	9.15979	2.5	6.47029	Afu5g09010	Ortholog of A. nidulans FGSC A4 : AN4676, A. niger CBS 513.88 : An07g04120, A. oryzae RIB40 : AO090020000473, Aspergillus sydowii : Aspsy1_0059438 and Aspergillus terreus NIH2624 : ATET_06565
Afu1g10430	48	9.18007	2.62876	6.48869	Afu1g10430	Ortholog of A. nidulans FGSC A4 : AN10168, A. niger CBS 513.88 : An08g02380, Neosartorya fischeri NRRL 181 : NFIA_015240, Aspergillus wentii : Aspwe1_0036585 and Aspergillus zonatus : Aspzo1_0163764
Afu4g09670	47	9.18447	2.65781	6.49301	Afu4g09670	Ortholog of A. nidulans FGSC A4 : AN1846, A. oryzae RIB40 : AO090003001272, Aspergillus wentii : Aspwe1_0102762, Aspergillus sydowii : Aspsy1_0026263 and Aspergillus terreus NIH2624 : ATET_00776
Afu3g09130	48	9.29065	2.64865	6.58962	Afu3g09130	Has domain(s) with predicted DNA binding, DNA-binding transcription factor activity, RNA polymerase II-specific, zinc ion binding activity and role in regulation of transcription, DNA-templated, transcription, DNA-templated
Afu5g11880	44	9.32406	2.77778	6.62059	Afu5g11880	Has domain(s) with predicted ATP binding, ligase activity, forming carbon-nitrogen bonds activity, role in tRNA processing and cytoplasm localization
Afu2g09930	44	9.32406	2.77778	6.62059	Afu2g09930	Ortholog(s) have S-adenosylmethionine-dependent methyltransferase activity and role in protein methylation
Afu1g13990	72	9.39506	2.20811	6.68695	Afu1g13990	Protein of unknown function; SrbA-regulated during hypoxia
Afu2g01140	52	9.41509	2.56534	6.70472	Afu2g01140	Predicted adhesin-like protein; ortholog of A. nidulans AN7654
Afu2g03270	56	9.43961	2.47826	6.72757	Afu2g03270	Has domain(s) with predicted catalytic activity
Afu2g13440	51	9.44203	2.59481	6.72942	chsE	Putative class V chitin synthase; required for normal hyphal growth, conidiation and normal conidiophore development; mutants have decreased chitin content
Afu1g13940	43	9.4548	2.83871	6.74158	sun2	Predicted adhesin-like protein; novel beta-1,3-glucan modifying enzyme involved in fungal morphogenesis
Afu6g12300	45	9.45879	2.77108	6.74525	Afu6g12300	RNP domain protein; conidia-enriched protein
Afu6g01910	54	9.45894	2.52525	6.74535	Afu6g01910	Has domain(s) with predicted nucleic acid binding activity
Afu3g13100	53	9.46558	2.54958	6.75147	Afu3g13100	Ortholog of A. nidulans FGSC A4 : AN3142, A. niger CBS 513.88 : An02g09000, A. oryzae RIB40 : AO090012000819, Aspergillus wentii : Aspwe1_0050035 and Aspergillus sydowii : Aspsy1_0056138
Afu4g09060	44	9.49879	2.8125	6.78232	Afu4g09060	Putative phosphatidate cytidylyltransferase
Afu4g06670	58	9.52638	2.45017	6.80703	aspf7	Allergen Asp f 7; transcript induced by voriconazole and by by growth on hydrogen peroxide
Afu5g07620	43	9.52946	2.85396	6.80703	Afu5g07620	Ortholog of A. nidulans FGSC A4 : AN3479, AN8495, AN3143, A. fumigatus Af293 : Afu3g01440, Afu3g13940, Afu4g03340 and A. niger CBS 513.88 : An13g02880, An09g04780
Afu2g00170	43	9.52946	2.85396	6.80703	Afu2g00170	Has domain(s) with predicted oxidoreductase activity, transferase activity, transferring acyl groups other than amino-acyl groups activity and role in oxidation-reduction process
Afu1g12200	43	9.52946	2.85396	6.80703	Afu1g12200	Ortholog of A. nidulans FGSC A4 : AN7874, AN10158, A. fumigatus Af293 : Afu3g00570, Afu8g02315 and A. niger CBS 513.88 : An08g04520, An06g00280, An16g02300
Afu5g09910	45	9.63239	2.80488	6.90176	Afu5g09910	Putative p-nitroreductase family protein; protein induced by heat shock; Yap1-dependent induction in response to hydrogen peroxide; induced by gliotoxin exposure
Afu8g05270	46	9.69689	2.78436	6.96082	Afu8g05270	Has domain(s) with predicted DNA binding, DNA-binding transcription factor activity, RNA polymerase II-specific, zinc ion binding activity and role in regulation of transcription, DNA-templated, transcription, DNA-templated
Afu6g12350	49	9.76737	2.70563	7.02724	atgI	Ortholog(s) have role in autophagy of mitochondrion, late nucleophagy, piecemeal microautophagy of the nucleus, protein homooligomerization and protein localization by the Cvt pathway, more
Afu5g12350	56	9.84119	2.54011	7.09563	Afu5g12350	Ortholog(s) have CDP reductase activity, role in CDP metabolic process, dCDP biosynthetic process and nucleus, ribonucleoside-diphosphate reductase complex localization
Afu8g05970	47	9.86591	2.78422	7.11766	Afu8g05970	Ortholog of A. nidulans FGSC A4 : AN5283, AN2708, AN1572, AN7419, A. fumigatus Af293 : Afu6g14000, A. niger CBS 513.88 : An07g02380, An08g07270 and A. oryzae RIB40 : AO090026000716, AO090005000543
Afu5g12035	51	9.8799	2.6694	7.1306	Afu5g12035	Ortholog of A. nidulans FGSC A4 : AN7644, A. fumigatus Af293 : Afu2g00625, A. niger CBS 513.88 : An18g06380 and A. oryzae RIB40 : AO090012000357, AO090001000307
Afu7g08235	63	9.89247	2.40783	7.14211	Afu7g08235	Protein of unknown function
Afu5g09330	44	9.91394	2.89575	7.16185	cipC	CipC-like, hyphal-specific protein; not concanamycin A or stress induced as it is in A. nidulans; reacts with rabbit immunosera exposed to A. fumigatus conidia
Afu4g12500	49	9.96636	2.74123	7.21126	Afu4g12500	Ortholog of A. nidulans AN3680; calcium induced
Afu8g07170	44	10.0281	2.91883	7.26549	Afu8g07170	Ortholog(s) have extracellular region localization
Afu4g14440	44	10.0281	2.91883	7.26549	Afu4g14440	Has domain(s) with predicted catalytic activity and role in metabolic process
Afu1g03352	44	10.0281	2.91883	7.26549	Afu1g03352	Has domain(s) with predicted hydrolase activity
Afu4g10270	49	10.0336	2.7533	7.27014	Afu4g10270	Ortholog(s) have 3-hydroxyacyl-CoA dehydratase activity, enoyl-CoA hydratase activity and role in fatty acid elongation, sphingolipid biosynthetic process, vacuolar transport
Afu2g01160	58	10.0484	2.52785	7.28416	Afu2g01160	Has domain(s) with predicted iron ion binding, oxidoreductase activity and role in fatty acid biosynthetic process, oxidation-reduction process
Afu7g04800	48	10.1213	2.8	7.35209	gprC	Rhodopsin-like G-protein coupled receptor
Afu2g17475	48	10.191	2.81286	7.41648	Afu2g17475	Ortholog of A. nidulans FGSC A4 : AN5367, A. oryzae RIB40 : AO090138000095, Neosartorya fischeri NRRL 181 : NFIA_092880, Aspergillus wentii : Aspwe1_0032360 and Aspergillus clavatus NRRL 1 : ACLA_076380
Afu4g13120	67	10.2058	2.38095	7.4307	Afu4g13120	Putative glutamine synthetase; protein induced by heat shock and by hydrogen peroxide; transcript induced by exposure to human airway epithelial cells
Afu3g13850	49	10.2555	2.7933	7.4764	Afu3g13850	Ortholog(s) have role in protein de-ADP-ribosylation
Afu5g02850	55	10.3059	2.63653	7.5235	Afu5g02850	Has domain(s) with predicted arylformamidase activity and role in tryptophan catabolic process to kynurenine
Afu3g12330	52	10.3251	2.71795	7.54143	Afu3g12330	Putative phosphatidyl synthase; transcript induced by exposure to human airway epithelial cells
Afu3g03610	58	10.3272	2.56969	7.54334	Afu3g03610	Has domain(s) with predicted cellulase activity, hydrolase activity, hydrolyzing O-glycosyl compounds activity and role in polysaccharide catabolic process
Afu4g07300	48	10.3497	2.84223	7.56439	Afu4g07300	Predicted adhesin-like protein
Afu2g05325	52	10.3581	2.72354	7.57213	Afu2g05325	Has domain(s) with predicted role in transmembrane transport and integral component of membrane localization
Afu6g12400	63	10.4227	2.48062	7.63247	fks1	Putative 1,3-beta-glucan synthase catalytic subunit, major subunit of glucan synthase; predicted transmembrane protein; essential
Afu1g13150	49	10.4296	2.82486	7.63878	Afu1g13150	Ortholog of A. oryzae RIB40 : AO090012000574 and Aspergillus niger ATCC 1015 : 47479-mRNA
Afu7g06060	47	10.5262	2.90909	7.72838	sit1	Putative siderophore transporter; SrbA-regulated during hypoxia
Afu3g00250	45	10.536	2.98369	7.73441	Afu3g00250	Has domain(s) with predicted FAD binding, oxidoreductase activity and role in metabolic process
Afu2g07430	52	10.6085	2.76618	7.80173	Afu2g07430	Has domain(s) with predicted metal ion binding activity
Afu6g03600	46	10.6604	2.97092	7.85058	Afu6g03600	Ortholog of A. nidulans FGSC A4 : AN6413, AN6419, AN6946, AN5312, AN5664, AN8328, AN3241, AN10369, AN1930, AN2386, AN1738, AN11159, AN8984, AN8951, AN1540, AN8971, AN9387, AN9266, AN9306, AN1317, AN10886, AN7232, AN7774, AN12202
Afu1g03620	51	10.662	2.80475	7.85157	Afu1g03620	Has domain(s) with predicted oxidoreductase activity, oxidoreductase activity, acting on the aldehyde or oxo group of donors, NAD or NADP as acceptor activity and role in oxidation-reduction process
Afu8g05600	63	10.7194	2.52167	7.90482	Afu8g05600	Ortholog of A. nidulans FGSC A4 : AN1549, A. niger CBS 513.88 : An16g07080, A. oryzae RIB40 : AO090005000583, Aspergillus wentii : Aspwe1_0187131 and Aspergillus sydowii : Aspsy1_0086712
Afu1g02190	48	10.7671	2.92014	7.94945	rab11	Ras GTPase; hypoxia repressed protein
Afu1g06980	46	10.7951	2.99745	7.97576	Afu1g06980	Ortholog(s) have structural constituent of ribosome activity and mitochondrial small ribosomal subunit localization
Afu4g03400	53	10.8112	2.77207	7.99095	Afu4g03400	Protein of unknown function
Afu3g14090	59	10.8904	2.63158	8.06519	Afu3g14090	Ortholog of A. nidulans FGSC A4 : AN2498, A. oryzae RIB40 : AO090012000646, Aspergillus wentii : Aspwe1_0407854, Aspergillus sydowii : Aspsy1_0148141 and Aspergillus terreus NIH2624 : ATET_04020
Afu2g09850	49	10.897	2.91036	8.07097	Afu2g09850	Putative oxidoreductase, 2-nitropropane dioxygenase family; transcript up-regulated in conidia exposed to neutrophils
Afu1g12530	55	10.9153	2.73438	8.08745	Afu1g12530	Ortholog(s) have delta12-fatty acid dehydrogenase activity and role in asexual sporulation resulting in formation of a cellular spore, unsaturated fatty acid biosynthetic process
Afu2g15790	55	10.9483	2.73973	8.11834	Afu2g15790	Ortholog(s) have RNA polymerase II core promoter sequence-specific DNA binding, cyclin-dependent protein serine/threonine kinase regulator activity
Afu8g02850	55	10.9981	2.74779	8.16514	Afu8g02850	Putative actin binding protein; transcript induced by exposure to human airway epithelial cells
Afu3g13920	49	11.008	2.93083	8.17464	Afu3g13920	Ortholog(s) have RNA polymerase II proximal promoter sequence-specific DNA binding, proximal promoter DNA-binding transcription activator activity, RNA polymerase II-specific activity
Afu7g06380	46	11.0531	3.04855	8.21338	Afu7g06380	Putative maltase
Afu3g00840	48	11.2025	3.00245	8.35298	Afu3g00840	FAD-dependant oxygenase; secreted protein; ortholog of A. nidulans AN10930, afoF, AN5258, AN7274, AN7269 and AN1310; transcript up-regulated in conidia exposed to neutrophils
Afu3g03410	57	11.2699	2.73843	8.4156	sidH	Enoyl-CoA hydratase/isomerase family protein; mevalonyl-CoA hydratase; PTS1 receptor-mediated peroxisomal localization is essential for triacetylfusarinine C (TAFC) biosynthesis
Afu6g04670	57	11.2864	2.74102	8.43092	derA	Small ERAD ER-resident membrane protein involved in ER-associated degradation; four predicted transmembrane helices and a short cytosolic C-terminal domain; mutants compensate by increasing the activity of the unfolded protein response
Afu5g03760	53	11.2961	2.85412	8.44001	chiA1	Putative class III chitinase; predicted GPI-anchoring sequence; protein and transcript repressed by caspofungin treatment
Afu6g06740	56	11.4023	2.78592	8.53896	Afu6g06740	Endoplasmic reticulum calcium ATPase; transcript induced by exposure to human airway epithelial cells
Afu3g12820	48	11.4175	3.04348	8.55336	Afu3g12820	Ortholog(s) have ATP-dependent microtubule motor activity and role in correction of merotelic kinetochore attachment, mitotic, microtubule sliding involved in mitotic spindle elongation, mitotic spindle elongation during mitotic anaphase
Afu3g09760	50	11.4183	2.97203	8.55394	Afu3g09760	Ortholog(s) have mitochondrial inner membrane, mitochondrial large ribosomal subunit localization
Afu3g01430	48	11.4372	3.04726	8.5712	Afu3g01430	Ortholog(s) have role in lipid droplet disassembly
Afu3g12460	53	11.4928	2.8877	8.62318	Afu3g12460	Ortholog of A. nidulans FGSC A4 : AN11707, A. niger CBS 513.88 : An02g08400, A. oryzae RIB40 : AO090005000723, Neosartorya fischeri NRRL 181 : NFIA_064840 and Aspergillus wentii : Aspwe1_0371733
Afu4g13620	66	11.5751	2.57891	8.70035	Afu4g13620	Ortholog of Aspergillus fumigatus A1163 : AFUB_070540
Afu5g06910	47	11.5791	3.11342	8.70066	Afu5g06910	Has domain(s) with predicted carbon-sulfur lyase activity and role in metabolic process
Afu3g03130	47	11.5791	3.11342	8.70066	Afu3g03130	Ortholog of Aspergillus fumigatus A1163 : AFUB_045120
Afu1g06580	57	11.7244	2.81008	8.83699	hel10	Ortholog of A. nidulans FGSC A4 : AN4252, AN10165, A. fumigatus Af293 : Afu1g11910, A. niger CBS 513.88 : An18g05640, An08g04120 and A. oryzae RIB40 : AO090001000456, AO090001000373
Afu1g02900	49	11.7597	3.07125	8.87071	Afu1g02900	Ortholog(s) have role in pyridoxal phosphate biosynthetic process
Afu3g13110	56	11.8703	2.86145	8.97486	Afu3g13110	Putative adhesin; extracellular serine-threonine rich protein
Afu1g02870	57	11.8801	2.8348	8.98375	Afu1g02870	Ortholog(s) have role in negative regulation of cellular response to oxidative stress
Afu1g08800	59	11.908	2.78552	9.00919	Afu1g08800	Ortholog(s) have 3-hydroxyphenylacetate 6-hydroxylase activity
Afu6g01950	59	11.9249	2.7881	9.0246	Afu6g01950	Transcript up-regulated in conidia exposed to neutrophils
Afu6g02830	58	12.0308	2.83109	9.12369	Afu6g02830	Has domain(s) with predicted oxidoreductase activity, role in oxidation-reduction process and mitochondrion localization
Afu3g10930	64	12.0331	2.68373	9.12564	Afu3g10930	Ortholog(s) have double-stranded DNA binding, sequence-specific DNA binding activity
Afu5g15030	48	12.1139	3.17828	9.19793	Afu5g15030	Putative Arsenic resistance protein; predicted gene pair with AFUA_1G16120
Afu3g09220	48	12.1139	3.17828	9.19793	Afu3g09220	Putative P450 family fatty acid hydroxylase with a possible role in the hydroxylation of a very long-chain fatty acid
Afu6g12870	52	12.2305	3.04948	9.30804	atm1	ABC iron exporter; transcript up-regulated in conidia exposed to neutrophils
Afu1g14800	52	12.4287	3.08498	9.49359	Afu1g14800	Protein of unknown function; transcript downregulated in response to voriconazole
Afu2g04000	58	12.4369	2.895	9.50127	Afu2g04000	Ortholog(s) have metal ion binding, misfolded protein binding, peptide-N4-(N-acetyl-beta-glucosaminyl)asparagine amidase activity, structural constituent of cell wall activity
Afu2g11810	55	12.5304	3.00107	9.58712	Afu2g11810	Ortholog(s) have nucleus localization
Afu8g05800	49	12.6573	3.24314	9.70398	finA	C6 zinc finger domain protein; transcript induced by voriconazole
Afu6g14340	49	12.6573	3.24314	9.70398	Afu6g14340	Has domain(s) with predicted UDP-N-acetylmuramate dehydrogenase activity, flavin adenine dinucleotide binding, oxidoreductase activity and role in oxidation-reduction process
Afu3g07890	64	12.8175	2.7945	9.85578	Afu3g07890	Ortholog of A. nidulans FGSC A4 : AN2953, A. niger CBS 513.88 : An02g11360, A. oryzae RIB40 : AO090005001486, Aspergillus wentii : Aspwe1_0041944 and Aspergillus sydowii : Aspsy1_0056308
Afu3g01580	58	12.8203	2.95591	9.85816	Afu3g01580	Putative glucose-methanol-choline (GMC) oxidoreductase; protein induced by hydrogen peroxide; hypoxia induced protein; repressed by gliotoxin exposure
Afu1g09580	56	12.8871	3.02869	9.9205	Afu1g09580	Has domain(s) with predicted plasma membrane localization
Afu2g08360	60	12.897	2.91031	9.92902	pyrG	Orotidine 5'-monophosphate decarboxylase
Afu3g08040	66	12.9206	2.76175	9.95044	Afu3g08040	Ortholog(s) have DNA-directed 5'-3' RNA polymerase activity, role in transcription by RNA polymerase II and RNA polymerase II, core complex localization
Afu2g14580	60	12.9876	2.92426	10.0138	Afu2g14580	Ortholog(s) have role in hyphal growth
Afu1g05230	51	12.9919	3.22581	10.0178	pdeB	Predicted 3',5'-cyclic-AMP phosphodiesterase
Afu3g07870	65	13.0534	2.80374	10.0761	Afu3g07870	Extracellular serine rich protein; predicted secretory signal sequence; ortholog of A. nidulans AN2954
Afu2g15120	54	13.2192	3.15367	10.2296	Afu2g15120	Ortholog of Aspergillus fumigatus A1163 : AFUB_030780
Afu2g04750	51	13.2298	3.27044	10.2394	Afu2g04750	Ortholog of A. nidulans FGSC A4 : AN2070, A. niger CBS 513.88 : An11g04410, A. oryzae RIB40 : AO090003000278, Aspergillus wentii : Aspwe1_0718370 and Aspergillus sydowii : Aspsy1_0142154
Afu5g02290	57	13.265	3.05907	10.273	Afu5g02290	Ortholog(s) have chloride transmembrane transporter activity, high-affinity potassium ion transmembrane transporter activity
Afu5g05800	59	13.3809	3.01508	10.3826	Afu5g05800	Has domain(s) with predicted peptidase activity, role in signal peptide processing and integral component of membrane, signal peptidase complex localization
Afu1g14320	53	13.4584	3.23353	10.4538	Afu1g14320	Ortholog(s) have clathrin binding activity, role in clathrin-dependent endocytosis, histone H2B ubiquitination, sterol regulatory element binding protein cleavage and Dsc E3 ubiquitin ligase complex, clathrin-coated vesicle localization
Afu3g04040	51	13.5397	3.32907	10.5313	Afu3g04040	Has domain(s) with predicted DNA binding, DNA-binding transcription factor activity, RNA polymerase II-specific, zinc ion binding activity and role in regulation of transcription, DNA-templated, transcription, DNA-templated
Afu4g09180	51	13.6072	3.3419	10.5959	Afu4g09180	Ortholog of Aspergillus fumigatus A1163 : AFUB_066280 and Aspergillus niger ATCC 1015 : 46815-mRNA
Afu2g17600	51	13.6524	3.35052	10.6396	pksP	Polyketide synthase involved in biosynthesis of the conidial pigment; controlled in part by the cAMP/protein kinase A (PKA) signal transduction pathway; mutants fail to inhibit phagolysosome acidification
Afu1g04480	54	13.6595	3.23149	10.6463	Afu1g04480	Ortholog(s) have Sin3-type complex localization
Afu8g00610	51	13.7694	3.37287	10.7476	mas1	Putative cell surface protein
Afu3g09630	72	13.8491	2.75264	10.8238	Afu3g09630	Ortholog(s) have asparagine-tRNA ligase activity, role in mitochondrial asparaginyl-tRNA aminoacylation and mitochondrion localization
Afu3g00880	61	13.9402	3.0422	10.9094	Afu3g00880	Putative adhesin protein; MedA regulated transcript; transcript repressed by exposure to human airway epithelial cells
Afu1g15540	56	14.3192	3.2721	11.2698	Afu1g15540	Ortholog of A. nidulans FGSC A4 : AN6482, AN0518, A. niger CBS 513.88 : An12g09790, A. oryzae RIB40 : AO090011000265, Neosartorya fischeri NRRL 181 : NFIA_009780 and Aspergillus wentii : Aspwe1_0118459
Afu4g03450	62	14.4749	3.0943	11.4139	Afu4g03450	Ortholog of A. nidulans FGSC A4 : AN9322, A. niger CBS 513.88 : An14g02560, An01g11380, A. oryzae RIB40 : AO090011000213, Aspergillus wentii : Aspwe1_0115377 and Aspergillus sydowii : Aspsy1_0073421
Afu6g11450	56	14.5157	3.30626	11.4523	Afu6g11450	Has domain(s) with predicted DNA binding, DNA-binding transcription factor activity, RNA polymerase II-specific, zinc ion binding activity and role in regulation of transcription, DNA-templated, transcription, DNA-templated
Afu1g13970	74	14.5158	2.79434	11.4525	Afu1g13970	Putative major facilitator superfamily (MFS) transporter
Afu3g03390	70	14.6373	2.90033	11.5671	sidJ	Predicted siderophore biosynthesis lipase/esterase involved in siderophore hydrolysis
Afu8g02040	68	14.8304	2.9767	11.7512	och3	Putative alpha-1,6-mannosyltransferase
Afu3g03370	65	14.9057	3.06977	11.8227	Afu3g03370	Ortholog of A. oryzae RIB40 : AO090020000169, Neosartorya fischeri NRRL 181 : NFIA_005530, Aspergillus versicolor : Aspve1_0032029 and Aspergillus clavatus NRRL 1 : ACLA_061330
Afu8g01770	53	14.9141	3.50259	11.8272	Afu8g01770	Predicted adhesin-like protein; transcript up-regulated in conidia exposed to neutrophils
Afu2g11450	53	14.9141	3.50259	11.8272	Afu2g11450	Has domain(s) with predicted methyltransferase activity and nucleolus localization
Afu3g00330	56	14.9179	3.37678	11.8309	Afu3g00330	Has domain(s) with predicted NAD binding, catalytic activity, coenzyme binding, oxidoreductase activity, acting on the aldehyde or oxo group of donors, NAD or NADP as acceptor activity
Afu2g13830	80	15.1952	2.7551	12.0958	Afu2g13830	Ortholog of A. niger CBS 513.88 : An02g05320, A. oryzae RIB40 : AO090026000191, Neosartorya fischeri NRRL 181 : NFIA_089010, Aspergillus wentii : Aspwe1_0045486 and Aspergillus versicolor : Aspve1_0481946
Afu8g06580	54	15.4982	3.56746	12.3816	Afu8g06580	Ortholog of A. nidulans FGSC A4 : AN8726, A. fumigatus Af293 : Afu7g00440, Afu8g06090 and A. niger CBS 513.88 : An02g08340, An02g09540, An03g00430
Afu5g06260	54	15.4982	3.56746	12.3816	Afu5g06260	Ortholog(s) have role in ATP-dependent chromatin remodeling, positive regulation of cellular response to phosphate starvation, regulation of nucleosome density and Ino80 complex localization
Afu4g11730	66	15.623	3.14554	12.501	gldB	Putative glycerol dehydrogenase; calcium induced; transcript induced by exposure to human airway epithelial cells
Afu5g06660	63	15.7231	3.25534	12.5953	Afu5g06660	UPF0187 domain membrane protein; transcript induced by exposure to human airway epithelial cells
Afu4g03480	58	15.9139	3.47059	12.777	Afu4g03480	Ortholog of Aspergillus fumigatus A1163 : AFUB_099570
Afu8g01700	56	16.079	3.58491	12.9342	Afu8g01700	Has domain(s) with predicted catalytic activity
Afu5g14660	59	16.1573	3.47222	13.0072	Afu5g14660	Ortholog of A. nidulans FGSC A4 : AN3345, AN3347, A. fumigatus Af293 : Afu5g00710, A. niger CBS 513.88 : An16g06090, An12g10000/gabA and A. oryzae RIB40 : AO090166000026, AO090005000509, AO090005001081
Afu3g07860	59	16.1808	3.47625	13.0292	Afu3g07860	Has domain(s) with predicted role in biosynthetic process
Afu1g02850	61	16.296	3.41786	13.1388	Afu1g02850	Ortholog of A. nidulans FGSC A4 : AN0275, A. fumigatus Af293 : Afu6g14530, A. niger CBS 513.88 : An01g04970, A. oryzae RIB40 : AO090005000775 and Aspergillus wentii : Aspwe1_0106139
Afu6g03680	60	16.307	3.45805	13.1491	Afu6g03680	Protein of unknown function; calcium induced
Afu4g04110	68	16.352	3.19149	13.1921	Afu4g04110	Ortholog of A. nidulans FGSC A4 : AN7031, A. niger CBS 513.88 : An14g00740, A. oryzae RIB40 : AO090206000082, Aspergillus wentii : Aspwe1_0115140 and Aspergillus sydowii : Aspsy1_0157921
Afu6g00620	60	16.3538	3.46591	13.1938	Afu6g00620	Putative GPI-anchored protein
Afu7g08530	92	16.6241	2.69878	13.451	Afu7g08530	Ortholog of A. niger CBS 513.88 : An10g00280, Aspergillus tubingensis : Asptu1_0053817, Aspergillus fumigatus A1163 : AFUB_097670, AFUB_098030 and Aspergillus sydowii : Aspsy1_0041373
Afu3g03550	56	16.6896	3.69718	13.5113	Afu3g03550	Ortholog of Aspergillus fumigatus A1163 : AFUB_044680
Afu4g03350	69	16.8225	3.22878	13.6376	exg10	Ortholog of A. oryzae RIB40 : AO090023000365, Aspergillus flavus NRRL 3357 : AFL2T_04220, Neosartorya fischeri NRRL 181 : NFIA_030120 and Aspergillus wentii : Aspwe1_0043359
Afu8g05710	63	17.0138	3.45946	13.8197	mfsA	Putative major facilitator superfamily (MFS) sugar transporter; calcium induced; transcript up-regulated in conidia exposed to neutrophils
Afu3g01900	66	17.0844	3.36345	13.8877	Afu3g01900	Has domain(s) with predicted role in lipid metabolic process
Afu3g03650	63	17.1775	3.48584	13.9761	sidG	Putative acetyltransferase with a predicted role in iron metabolism; located in an iron-regulated gene cluster; fusarinine C acetyltransferase; SrbA-regulated during hypoxia
Afu4g10880	61	17.6899	3.65135	14.4619	Afu4g10880	Protein of unknown function; mutation causes increased azole resistance
Afu2g02070	67	17.7106	3.42397	14.4813	Afu2g02070	Ortholog(s) have role in nuclear-transcribed mRNA poly(A) tail shortening and CCR4-NOT core complex localization
Afu6g04270	60	17.7799	3.71046	14.5475	Afu6g04270	Putative MFS sugar transporter; transcript up-regulated in conidia exposed to neutrophils
Afu1g16450	68	17.9767	3.42942	14.7289	Afu1g16450	Ortholog of Aspergillus fumigatus A1163 : AFUB_015790
Afu3g03230	60	18.0403	3.75616	14.7912	Afu3g03230	Has domain(s) with predicted DNA-binding transcription factor activity, sequence-specific DNA binding activity and role in regulation of transcription, DNA-templated
Afu4g03320	122	18.3866	2.46988	15.1226	Afu4g03320	Putative cation exchanger; calcium induced
Afu4g03321	93	18.8761	2.91022	15.5882	ubiE	Putative methyltransferase; conidia-enriched protein
Afu8g04070	66	18.9242	3.64924	15.634	Afu8g04070	Putative glucosamine-6-phosphate deaminase; transcript up-regulated in conidia exposed to neutrophils
Afu2g06100	66	18.9743	3.65721	15.6822	Afu2g06100	Ortholog of A. nidulans FGSC A4 : AN7443, A. niger CBS 513.88 : An02g14710, A. oryzae RIB40 : AO090001000726, Aspergillus wentii : Aspwe1_0110234 and Aspergillus sydowii : Aspsy1_0152786
Afu2g09510	76	19.3605	3.36833	16.0493	Afu2g09510	Protein of unknown function; transcript downregulated in response to voriconazole
Afu7g00930	62	19.6867	3.95232	16.3613	Afu7g00930	Ortholog of A. nidulans FGSC A4 : AN6413, AN6419, AN6946, AN5312, AN5664, AN8328, AN3241, AN10369, AN1930, AN2386, AN1738, AN11159, AN8984, AN8951, AN1540, AN8971, AN9387, AN9266, AN9306, AN1317, AN10886, AN7232, AN7774, AN12202
Afu6g14510	61	19.7964	4.0215	16.4622	Afu6g14510	Has domain(s) with predicted FAD binding, oxidoreductase activity and role in metabolic process
Afu2g12720	61	19.7964	4.0215	16.4622	Afu2g12720	Ortholog of Aspergillus fumigatus A1163 : AFUB_028360
Afu3g12120	71	20.2079	3.65482	16.854	ppoC	Putative fatty acid oxygenase
Afu1g10600	72	20.2517	3.62463	16.8952	Afu1g10600	Ortholog of A. nidulans FGSC A4 : AN1219, A. niger CBS 513.88 : An08g02600, A. oryzae RIB40 : AO090038000362, Aspergillus wentii : Aspwe1_0095261 and Aspergillus sydowii : Aspsy1_0025527
Afu3g11790	70	21.1271	3.83369	17.7255	Afu3g11790	Has domain(s) with predicted transmembrane transporter activity, role in transmembrane transport and integral component of membrane, membrane localization
Afu7g03800	72	21.212	3.76677	17.8068	Afu7g03800	Ortholog of A. nidulans FGSC A4 : AN4273, A. niger CBS 513.88 : An13g00220, A. oryzae RIB40 : AO090026000834, Aspergillus wentii : Aspwe1_0026252 and Aspergillus sydowii : Aspsy1_1088954
Afu3g03270	79	21.2274	3.52423	17.8216	Afu3g03270	Has domain(s) with predicted catalytic activity and role in metabolic process
Afu6g12522	73	21.4007	3.75635	17.9867	skn7	Putative transcription factor and response regulator of a two-component signal transduction system
Afu8g06300	66	23.0753	4.34581	19.5888	Afu8g06300	Ortholog of Aspergillus fumigatus A1163 : AFUB_078930
Afu6g02790	76	23.6178	3.96498	20.1043	Afu6g02790	Has domain(s) with predicted alcohol O-acetyltransferase activity and role in alcohol metabolic process
Afu7g00580	67	23.7506	4.41067	20.2303	Afu7g00580	Putative adhesin; expression induced in biofilm
Afu2g13890	78	23.7906	3.91089	20.2676	anxc3.2	Putative annexin; calcium induced
Afu3g03720	69	23.8465	4.32099	20.3206	Afu3g03720	Protein of unknown function; calcium induced
Afu6g03050	90	24.3898	3.58833	20.8353	Afu6g03050	Oleate delta-12 destaurase; SrbA-regulated during hypoxia
Afu2g17170	74	24.7148	4.21822	21.1448	Afu2g17170	Ortholog(s) have potassium:proton antiporter activity, sodium:proton antiporter activity
Afu2g10770	78	25.1694	4.1103	21.5828	Afu2g10770	Putative transcription factor
Afu2g09630	73	25.2596	4.35294	21.671	Afu2g09630	Protein of unknown function; transcript induced by voriconazole
Afu2g16540	83	25.9157	4.0153	22.3085	Afu2g16540	Ortholog of A. nidulans FGSC A4 : AN7330, A. niger CBS 513.88 : An15g07080, A. oryzae RIB40 : AO090102000189, Aspergillus wentii : Aspwe1_0067784 and Aspergillus sydowii : Aspsy1_0140355
Afu8g02110	76	26.1928	4.3552	22.5771	Afu8g02110	Ortholog of Aspergillus fumigatus A1163 : AFUB_084500
Afu6g00680	78	28.1022	4.55594	24.4382	Afu6g00680	Has domain(s) with predicted role in mycotoxin biosynthetic process
Afu3g03440	83	28.1923	4.33437	24.5263	mirD	Putative siderophore transporter; expression upregulated under low iron conditions; SrbA-regulated during hypoxia
Afu4g10040	86	28.8163	4.29418	25.1364	Afu4g10040	Ortholog(s) have Golgi cisterna, endosome localization
Afu5g13050	85	29.7559	4.46985	26.0594	Afu5g13050	Ortholog(s) have microtubule motor activity, protein homodimerization activity and kinesin complex, medial cortical node localization
Afu1g00570	105	45.2527	5.65032	41.367	Afu1g00570	Predicted mariner Ant1 transposon-related ORF
Afu8g01260	110	45.602	5.43585	41.7127	Afu8g01260	Protein of unknown function; transcript induced by voriconazole
Afu2g13930	183	70.9277	5.23322	66.6688	Afu2g13930	Ortholog of A. nidulans FGSC A4 : AN6380, A. niger CBS 513.88 : An02g05120, A. oryzae RIB40 : AO090026000179, Neosartorya fischeri NRRL 181 : NFIA_089090 and Aspergillus versicolor : Aspve1_0052622
Afu1g13300	276	92.2418	4.58609	87.237	Afu1g13300	Ortholog(s) have cyclohydrolase activity and role in riboflavin biosynthetic process

## Sheet: Categorization_CSP_exclusive
Iron homeostasis
Cell wall organization
ID	Name	Bgd count	Result count	Result gene list	Pct of bgd	Fold enrichment	Odds ratio	P-value	Benjamini	Bonferroni
GO:0050896	response to stimulus	1016	100	Afu1g02190,Afu1g03040,Afu1g03210,Afu1g04540,Afu1g05230,Afu1g06900,Afu1g10380,Afu1g10570,Afu1g10760,Afu1g11110,Afu1g12680,Afu1g12920,Afu1g13790,Afu1g14280,Afu1g14320,Afu1g14410,Afu1g14810,Afu1g15440,Afu1g17200,Afu1g17270,Afu2g00660,Afu2g01700,Afu2g01850,Afu2g02310,Afu2g03700,Afu2g04000,Afu2g05830,Afu2g05860,Afu2g06140,Afu2g08060,Afu2g08360,Afu2g08540,Afu2g09010,Afu2g10150,Afu2g13440,Afu2g14810,Afu…	9.8	1.24	1.3	0.0121987	0.745948	1
GO:0007154	cell communication	307	33	Afu1g03210,Afu1g05230,Afu1g11110,Afu1g12680,Afu1g14320,Afu1g17200,Afu1g17270,Afu2g00660,Afu2g01700,Afu2g05830,Afu2g15790,Afu3g03410,Afu3g03440,Afu3g04070,Afu3g06030,Afu3g07940,Afu3g12330,Afu3g12400,Afu4g06480,Afu4g07080,Afu4g11310,Afu4g12910,Afu5g08420,Afu6g05260,Afu6g06860,Afu6g07430,Afu6g09110,Afu6g11190,Afu6g12522,Afu7g04450,Afu7g06380,Afu8g04100,Afu8g04180,	10.7	1.35	1.41	0.0453443	0.745948	1
GO:0044419	interspecies interaction between organisms	180	25	Afu1g06390,Afu1g06900,Afu1g10570,Afu1g14070,Afu1g15440,Afu1g15780,Afu2g03120,Afu2g05830,Afu2g08360,Afu2g17170,Afu2g17600,Afu3g03410,Afu3g04070,Afu3g07870,Afu3g09690,Afu4g07080,Afu4g12970,Afu5g01970,Afu6g05260,Afu6g07430,Afu6g11190,Afu6g12400,Afu7g04800,Afu8g04070,Afu8g04100,	13.9	1.75	1.9	0.00418888	0.745948	1
GO:0009405	pathogenesis	154	21	Afu1g06900,Afu1g10570,Afu1g14070,Afu1g15780,Afu2g03120,Afu2g05830,Afu2g08360,Afu2g17170,Afu2g17600,Afu3g03410,Afu3g04070,Afu3g07870,Afu3g09690,Afu4g07080,Afu4g12970,Afu6g05260,Afu6g11190,Afu6g12400,Afu7g04800,Afu8g04070,Afu8g04100,	13.6	1.72	1.85	0.0101142	0.745948	1
GO:0071852	fungal-type cell wall organization or biogenesis	133	20	Afu1g10380,Afu1g11110,Afu2g01700,Afu2g03120,Afu2g05860,Afu2g13440,Afu2g15790,Afu3g07870,Afu3g12690,Afu3g12700,Afu4g07080,Afu4g11510,Afu4g12970,Afu5g04060,Afu5g06050,Afu5g08420,Afu6g08510,Afu6g12400,Afu8g02810,Afu8g05620,	15	1.89	2.08	0.00403552	0.745948	1
GO:0071555	cell wall organization	110	18	Afu1g10380,Afu1g11110,Afu2g01700,Afu2g03120,Afu2g05860,Afu2g13440,Afu2g15790,Afu2g17600,Afu3g07870,Afu3g12690,Afu3g12700,Afu4g07080,Afu4g12970,Afu5g04060,Afu5g08420,Afu6g08510,Afu6g12400,Afu8g02810,	16.4	2.06	2.3	0.0024609	0.745948	1
GO:0045229	external encapsulating structure organization	110	18	Afu1g10380,Afu1g11110,Afu2g01700,Afu2g03120,Afu2g05860,Afu2g13440,Afu2g15790,Afu2g17600,Afu3g07870,Afu3g12690,Afu3g12700,Afu4g07080,Afu4g12970,Afu5g04060,Afu5g08420,Afu6g08510,Afu6g12400,Afu8g02810,	16.4	2.06	2.3	0.0024609	0.745948	1
GO:0031505	fungal-type cell wall organization	98	17	Afu1g10380,Afu1g11110,Afu2g01700,Afu2g03120,Afu2g05860,Afu2g13440,Afu2g15790,Afu3g07870,Afu3g12690,Afu3g12700,Afu4g07080,Afu4g12970,Afu5g04060,Afu5g08420,Afu6g08510,Afu6g12400,Afu8g02810,	17.3	2.18	2.46	0.00168836	0.745948	1
GO:0044262	cellular carbohydrate metabolic process	138	17	Afu1g10570,Afu1g12920,Afu1g15440,Afu1g15780,Afu2g13440,Afu3g12690,Afu3g12700,Afu4g10150,Afu4g11540,Afu4g11730,Afu4g12050,Afu5g08900,Afu6g12400,Afu7g01830,Afu7g05450,Afu7g06380,Afu8g05620,	12.3	1.55	1.64	0.0459661	0.745948	1
GO:0009607	response to biotic stimulus	129	16	Afu2g00660,Afu2g05830,Afu2g17600,Afu3g06050,Afu3g12330,Afu4g07080,Afu4g12970,Afu5g01970,Afu5g08420,Afu6g05260,Afu6g07430,Afu6g12522,Afu7g01870,Afu7g06380,Afu8g04070,Afu8g04100,	12.4	1.56	1.65	0.0491329	0.745948	1
GO:0036180	filamentous growth of a population of unicellular organisms in response to biotic stimulus	105	14	Afu2g00660,Afu2g05830,Afu3g06050,Afu3g12330,Afu4g07080,Afu4g12970,Afu5g08420,Afu6g05260,Afu6g07430,Afu6g12522,Afu7g01870,Afu7g06380,Afu8g04070,Afu8g04100,	13.3	1.68	1.8	0.0377264	0.745948	1
GO:0006875	cellular metal ion homeostasis	94	13	Afu1g11110,Afu1g13340,Afu1g17200,Afu1g17270,Afu2g05860,Afu2g08900,Afu2g09570,Afu2g17170,Afu3g03410,Afu3g03440,Afu4g06770,Afu5g02290,Afu7g06060,	13.8	1.74	1.87	0.0342071	0.745948	1
GO:0055065	metal ion homeostasis	97	13	Afu1g11110,Afu1g13340,Afu1g17200,Afu1g17270,Afu2g05860,Afu2g08900,Afu2g09570,Afu2g17170,Afu3g03410,Afu3g03440,Afu4g06770,Afu5g02290,Afu7g06060,	13.4	1.69	1.81	0.0426431	0.745948	1
GO:0042546	cell wall biogenesis	72	12	Afu2g01700,Afu2g13440,Afu2g17600,Afu3g07870,Afu3g12690,Afu3g12700,Afu4g07080,Afu4g11510,Afu5g06050,Afu5g08420,Afu6g12400,Afu8g05620,	16.7	2.1	2.34	0.0106125	0.745948	1
GO:0006970	response to osmotic stress	59	11	Afu1g03040,Afu1g10570,Afu1g14810,Afu2g00660,Afu2g01700,Afu2g13440,Afu2g17170,Afu4g11730,Afu4g12970,Afu5g08420,Afu6g12522,	18.6	2.35	2.68	0.0060897	0.745948	1
GO:0009272	fungal-type cell wall biogenesis	56	10	Afu2g01700,Afu3g07870,Afu3g12690,Afu3g12700,Afu4g07080,Afu4g11510,Afu5g06050,Afu5g08420,Afu6g12400,Afu8g05620,	17.9	2.25	2.54	0.0118113	0.745948	1
GO:0016051	carbohydrate biosynthetic process	57	10	Afu1g10570,Afu1g15440,Afu2g13440,Afu3g12690,Afu3g12700,Afu4g11310,Afu6g07720,Afu6g12400,Afu7g01830,Afu8g05620,	17.5	2.21	2.48	0.0133371	0.745948	1
GO:0044264	cellular polysaccharide metabolic process	64	10	Afu1g12920,Afu1g15440,Afu2g13440,Afu3g12690,Afu3g12700,Afu4g10150,Afu6g12400,Afu7g01830,Afu7g05450,Afu8g05620,	15.6	1.97	2.16	0.0284394	0.745948	1
GO:0044403	symbiont process	55	9	Afu1g06390,Afu1g10570,Afu1g15440,Afu2g03120,Afu2g08360,Afu2g17600,Afu4g12970,Afu5g01970,Afu6g07430,	16.4	2.06	2.28	0.0280283	0.745948	1
GO:0071470	cellular response to osmotic stress	35	8	Afu1g10570,Afu2g00660,Afu2g01700,Afu2g13440,Afu4g11730,Afu4g12970,Afu5g08420,Afu6g12522,	22.9	2.88	3.46	0.00522337	0.745948	1
GO:0034637	cellular carbohydrate biosynthetic process	49	8	Afu1g10570,Afu1g15440,Afu2g13440,Afu3g12690,Afu3g12700,Afu6g12400,Afu7g01830,Afu8g05620,	16.3	2.06	2.27	0.0376628	0.745948	1
GO:0033692	cellular polysaccharide biosynthetic process	32	7	Afu1g15440,Afu2g13440,Afu3g12690,Afu3g12700,Afu6g12400,Afu7g01830,Afu8g05620,	21.9	2.75	3.27	0.0112838	0.745948	1
GO:0000271	polysaccharide biosynthetic process	33	7	Afu1g15440,Afu2g13440,Afu3g12690,Afu3g12700,Afu6g12400,Afu7g01830,Afu8g05620,	21.2	2.67	3.14	0.0133664	0.745948	1
GO:0022610	biological adhesion	33	7	Afu1g10570,Afu2g01700,Afu2g03120,Afu2g08360,Afu3g07870,Afu4g04070,Afu5g01970,	21.2	2.67	3.14	0.0133664	0.745948	1
GO:0051651	maintenance of location in cell	25	6	Afu1g17200,Afu2g07730,Afu2g10930,Afu3g10360,Afu5g08420,Afu6g11190,	24	3.02	3.68	0.0117806	0.745948	1
GO:0044038	cell wall macromolecule biosynthetic process	31	6	Afu2g13440,Afu3g12690,Afu3g12700,Afu4g11510,Afu6g12400,Afu8g05620,	19.4	2.44	2.8	0.0326823	0.745948	1
GO:0070589	cellular component macromolecule biosynthetic process	31	6	Afu2g13440,Afu3g12690,Afu3g12700,Afu4g11510,Afu6g12400,Afu8g05620,	19.4	2.44	2.8	0.0326823	0.745948	1
GO:0000902	cell morphogenesis	33	6	Afu1g06900,Afu1g09270,Afu1g11110,Afu2g13440,Afu2g17170,Afu5g08420,	18.2	2.29	2.59	0.0430102	0.745948	1
GO:0070592	cell wall polysaccharide biosynthetic process	22	5	Afu2g13440,Afu3g12690,Afu3g12700,Afu6g12400,Afu8g05620,	22.7	2.86	3.42	0.0263874	0.745948	1
GO:0009303	rRNA transcription	5	4	Afu1g13790,Afu3g10120,Afu5g04440,Afu6g08170,	80	10.07	46.59	0.000185118	0.40004	0.40004
GO:0008361	regulation of cell size	8	4	Afu1g14750,Afu2g09570,Afu6g12400,Afu6g12522,	50	6.29	11.64	0.00213276	0.745948	1
GO:1901678	iron coordination entity transport	9	4	Afu1g17270,Afu3g03440,Afu5g01970,Afu7g06060,	44.4	5.6	9.31	0.00359888	0.745948	1
GO:0019400	alditol metabolic process	14	4	Afu1g10570,Afu4g11540,Afu4g11730,Afu5g08900,	28.6	3.6	4.65	0.0207634	0.745948	1
GO:0098781	ncRNA transcription	17	4	Afu1g13790,Afu3g10120,Afu5g04440,Afu6g08170,	23.5	2.96	3.58	0.0408471	0.745948	1
GO:0006633	fatty acid biosynthetic process	17	4	Afu1g12530,Afu3g12120,Afu4g10270,Afu6g03050,	23.5	2.96	3.58	0.0408471	0.745948	1
GO:0015891	siderophore transport	7	3	Afu1g17270,Afu3g03440,Afu7g06060,	42.9	5.4	8.72	0.0137042	0.745948	1
GO:0006071	glycerol metabolic process	7	3	Afu1g10570,Afu4g11540,Afu4g11730,	42.9	5.4	8.72	0.0137042	0.745948	1
GO:0015688	iron chelate transport	7	3	Afu1g17270,Afu3g03440,Afu7g06060,	42.9	5.4	8.72	0.0137042	0.745948	1
GO:0051240	positive regulation of multicellular organismal process	9	3	Afu1g16840,Afu2g00660,Afu5g08420,	33.3	4.2	5.81	0.0291712	0.745948	1
GO:0075261	positive regulation of spore-bearing organ development	9	3	Afu1g16840,Afu2g00660,Afu5g08420,	33.3	4.2	5.81	0.0291712	0.745948	1
GO:0009611	response to wounding	2	2	Afu2g08060,Afu5g08830,	100	12.59	inf	0.00630164	0.745948	1
GO:0006421	asparaginyl-tRNA aminoacylation	2	2	Afu2g05650,Afu3g09630,	100	12.59	inf	0.00630164	0.745948	1
GO:0006043	glucosamine catabolic process	2	2	Afu8g04070,Afu8g04100,	100	12.59	inf	0.00630164	0.745948	1
GO:0036369	transcription factor catabolic process	3	2	Afu2g14810,Afu5g04060,	66.7	8.39	23.24	0.0179062	0.745948	1
GO:0042790	nucleolar large rRNA transcription by RNA polymerase I	3	2	Afu3g10120,Afu6g08170,	66.7	8.39	23.24	0.0179062	0.745948	1
GO:0042823	pyridoxal phosphate biosynthetic process	3	2	Afu1g02900,Afu5g08090,	66.7	8.39	23.24	0.0179062	0.745948	1
GO:0006046	N-acetylglucosamine catabolic process	3	2	Afu8g04070,Afu8g04100,	66.7	8.39	23.24	0.0179062	0.745948	1
GO:0018345	protein palmitoylation	3	2	Afu2g07670,Afu5g08740,	66.7	8.39	23.24	0.0179062	0.745948	1
GO:0010620	negative regulation of transcription by transcription factor catabolism	3	2	Afu2g14810,Afu5g04060,	66.7	8.39	23.24	0.0179062	0.745948	1
GO:0080040	positive regulation of cellular response to phosphate starvation	3	2	Afu1g10280,Afu5g06260,	66.7	8.39	23.24	0.0179062	0.745948	1
GO:0006041	glucosamine metabolic process	3	2	Afu8g04070,Afu8g04100,	66.7	8.39	23.24	0.0179062	0.745948	1
GO:0007232	osmosensory signaling pathway via Sho1 osmosensor	3	2	Afu2g01700,Afu5g08420,	66.7	8.39	23.24	0.0179062	0.745948	1
GO:0042822	pyridoxal phosphate metabolic process	3	2	Afu1g02900,Afu5g08090,	66.7	8.39	23.24	0.0179062	0.745948	1
GO:0140255	regulation of cellular response to phosphate starvation	3	2	Afu1g10280,Afu5g06260,	66.7	8.39	23.24	0.0179062	0.745948	1
GO:0046490	isopentenyl diphosphate metabolic process	4	2	Afu2g03700,Afu4g07130,	50	6.29	11.62	0.0339335	0.745948	1
GO:0045722	positive regulation of gluconeogenesis	4	2	Afu2g01700,Afu2g05830,	50	6.29	11.62	0.0339335	0.745948	1
GO:0060240	negative regulation of signal transduction involved in conjugation with cellular fusion	4	2	Afu2g03510,Afu2g07670,	50	6.29	11.62	0.0339335	0.745948	1
GO:0090029	negative regulation of pheromone-dependent signal transduction involved in conjugation with cellular fusion	4	2	Afu2g03510,Afu2g07670,	50	6.29	11.62	0.0339335	0.745948	1
GO:0019287	isopentenyl diphosphate biosynthetic process, mevalonate pathway	4	2	Afu2g03700,Afu4g07130,	50	6.29	11.62	0.0339335	0.745948	1
GO:0046184	aldehyde biosynthetic process	4	2	Afu1g02900,Afu5g08090,	50	6.29	11.62	0.0339335	0.745948	1
GO:0000025	maltose catabolic process	4	2	Afu4g10150,Afu7g06380,	50	6.29	11.62	0.0339335	0.745948	1
GO:0006636	unsaturated fatty acid biosynthetic process	4	2	Afu1g12530,Afu3g12120,	50	6.29	11.62	0.0339335	0.745948	1
GO:0008295	spermidine biosynthetic process	4	2	Afu2g17600,Afu4g08010,	50	6.29	11.62	0.0339335	0.745948	1
GO:0006821	chloride transport	4	2	Afu2g08900,Afu5g02290,	50	6.29	11.62	0.0339335	0.745948	1
GO:0008216	spermidine metabolic process	4	2	Afu2g17600,Afu4g08010,	50	6.29	11.62	0.0339335	0.745948	1
GO:0009240	isopentenyl diphosphate biosynthetic process	4	2	Afu2g03700,Afu4g07130,	50	6.29	11.62	0.0339335	0.745948	1
GO:0090053	positive regulation of chromatin silencing at centromere	4	2	Afu1g10280,Afu5g06260,	50	6.29	11.62	0.0339335	0.745948	1
GO:0042816	vitamin B6 metabolic process	4	2	Afu1g02900,Afu5g08090,	50	6.29	11.62	0.0339335	0.745948	1
GO:0042819	vitamin B6 biosynthetic process	4	2	Afu1g02900,Afu5g08090,	50	6.29	11.62	0.0339335	0.745948	1
GO:0033559	unsaturated fatty acid metabolic process	4	2	Afu1g12530,Afu3g12120,	50	6.29	11.62	0.0339335	0.745948	1
